# Supplementary material
Source: PubMed Central journal article supplement (PMC2424160)
Supplement: blood-2007-11-126003_1.pdf [file blood-2007-11-126003_1.pdf]

| Affymetrix ID | Gene Symbol | Description                                                                   | log2 (Fold Change) | teststat   | Raw p-value | Benjamini-Hochberg |
|---------------|-------------|-------------------------------------------------------------------------------|--------------------|------------|-------------|--------------------|
| 214328_s_at   | EIF3S3      | eukaryotic translation initiation factor 3, subunit 3 gamma, 40kDa            | 0.713576           | 21.362841  | 2.63E-10    | 5.32E-06           |
| 224187_x_at   | HSPA8       | heat shock 70kDa protein 8                                                    | 2.379127           | 20.592240  | 3.91E-10    | 5.32E-06           |
| 210211_s_at   | HSP90AA1    | heat shock protein 90kDa alpha (cytosolic), class A member 1                  | 0.902148           | 20.344194  | 4.45E-10    | 5.32E-06           |
| 208744_x_at   | HSPH1       | heat shock 105kDa/110kDa protein 1                                            | 3.489690           | 20.296077  | 4.56E-10    | 5.32E-06           |
| 208687_x_at   | HSPA8       | heat shock 70kDa protein 8                                                    | 2.493492           | 20.175406  | 4.87E-10    | 5.32E-06           |
| 210338_s_at   | HSPA8       | heat shock 70kDa protein 8                                                    | 2.690309           | 19.772756  | 6.04E-10    | 5.50E-06           |
| 221891_x_at   | HSPA8       | heat shock 70kDa protein 8                                                    | 2.178976           | 18.416132  | 1.29E-09    | 1.01E-05           |
| 211969_at     | HSP90AA1    | heat shock protein 90kDa alpha (cytosolic), class A member 1                  | 2.253354           | 17.055848  | 2.93E-09    | 1.92E-05           |
| 200799_at     | HSPA1A      | heat shock 70kDa protein 1A                                                   | 1.911737           | 16.918975  | 3.19E-09    | 1.92E-05           |
| 224806_at     | TRIM25      | tripartite motif-containing 25                                                | -2.220000          | -16.671099 | 3.73E-09    | 1.92E-05           |
| 203665_at     | HMOX1       | heme oxygenase (decycling) 1                                                  | 5.147491           | 16.616412  | 3.86E-09    | 1.92E-05           |
| 209882_at     | RIT1        | Ras-like without CAAX 1                                                       | 1.407571           | 14.891853  | 1.23E-08    | 5.60E-05           |
| 211968_s_at   | HSP90AA1    | heat shock protein 90kDa alpha (cytosolic), class A member 1                  | 2.622331           | 14.569885  | 1.55E-08    | 6.09E-05           |
| 203810_at     | DNAJB4      | DnaJ (Hsp40) homolog, subfamily B, member 4                                   | 3.791099           | 14.559934  | 1.56E-08    | 6.09E-05           |
| 239377_at     | MGC11102    |                                                                               | 0.649539           | 14.440377  | 1.70E-08    | 6.19E-05           |
| 206976_s_at   | HSPH1       | heat shock 105kDa/110kDa protein 1                                            | 3.593631           | 13.909715  | 2.52E-08    | 8.60E-05           |
| 213330_s_at   | STIP1       | stress-induced-phosphoprotein 1 (Hsp70/Hsp90-organizing protein)              | 1.509496           | 13.818552  | 2.69E-08    | 8.67E-05           |
| 200800_s_at   | HSPA1A      | heat shock 70kDa protein 1A                                                   | 3.359839           | 13.536778  | 3.34E-08    | 9.64E-05           |
| 202581_at     | HSPA1B      | heat shock 70kDa protein 1B                                                   | 3.516971           | 13.532665  | 3.35E-08    | 9.64E-05           |
| 200041_s_at   | BAT1        | HLA-B associated transcript 1                                                 | -0.919782          | -13.435815 | 3.61E-08    | 9.87E-05           |
| 1554241_at    | COCH        | coagulation factor C homolog, cochlin (Limulus polyphemus)                    | 0.496340           | 13.370669  | 3.80E-08    | 9.89E-05           |
| 1552664_at    | FLCN        | folliculin                                                                    | 0.795563           | 13.204005  | 4.33E-08    | 0.000107574        |
| 204285_s_at   | PMAIP1      | phorbol-12-myristate-13-acetate-induced protein 1                             | 1.855945           | 12.860731  | 5.69E-08    | 0.000128752        |
| 200627_at     | PTGES3      | prostaglandin E synthase 3 (cytosolic)                                        | 0.814503           | 12.831463  | 5.83E-08    | 0.000128752        |
| 201326_at     | CCT6A       | chaperonin containing TCP1, subunit 6A (zeta 1)                               | 1.271642           | 12.818525  | 5.89E-08    | 0.000128752        |
| 228775_at     | TMEM111     | transmembrane protein 111                                                     | 1.462819           | 12.758518  | 6.18E-08    | 0.000129967        |
| 202059_s_at   | KPNA1       | karyopherin alpha 1 (importin alpha 5)                                        | 1.175957           | 12.566972  | 7.23E-08    | 0.000138528        |
| 209431_s_at   | ZNF278      | zinc finger protein 278                                                       | -2.104674          | -12.543550 | 7.37E-08    | 0.000138528        |
| 234986_at     | GCLM        | glutamate-cysteine ligase, modifier subunit                                   | 3.247132           | 12.515355  | 7.54E-08    | 0.000138528        |
| 202912_at     | ADM         | adrenomedullin                                                                | 1.787491           | 12.505879  | 7.60E-08    | 0.000138528        |
| 221290_s_at   | MUM1        | melanoma associated antigen (mutated) 1                                       | 1.632303           | 12.240850  | 9.48E-08    | 0.00016722         |
| 209360_s_at   | RUNX1       | runt-related transcription factor 1 (acute myeloid leukemia 1, aml1 oncogene) | -0.914825          | -12.099158 | 1.07E-07    | 0.000181639        |
| 221875_x_at   | HLA-F       | major histocompatibility complex, class I, F                                  | -0.790801          | -12.056972 | 1.11E-07    | 0.000181639        |
| 201491_at     | AHSA1       | AHA1, activator of heat shock 90kDa protein ATPase homolog 1 (yeast)          | 1.744428           | 11.973440  | 1.19E-07    | 0.000181639        |
| 201468_s_at   | NQO1        | NAD(P)H dehydrogenase, quinone 1                                              | 2.397648           | 11.963762  | 1.20E-07    | 0.000181639        |

|             |           |                                                                                           |           |            |          |             |
|-------------|-----------|-------------------------------------------------------------------------------------------|-----------|------------|----------|-------------|
| 228519_x_at | CIRBP     | cold inducible RNA binding protein                                                        | -1.467105 | -11.950345 | 1.21E-07 | 0.000181639 |
| 211296_x_at | UBC       | ubiquitin C                                                                               | 1.062867  | 11.923352  | 1.24E-07 | 0.000181639 |
| 234005_x_at | STK36     | serine/threonine kinase 36 (fused homolog, Drosophila)                                    | -0.704830 | -11.904852 | 1.26E-07 | 0.000181639 |
| 218417_s_at | FLJ20489  |                                                                                           | 1.979109  | 11.786802  | 1.40E-07 | 0.000196037 |
| 200811_at   | CIRBP     | cold inducible RNA binding protein                                                        | -1.042938 | -11.674718 | 1.54E-07 | 0.000210799 |
| 202939_at   | ZMPSTE24  | zinc metalloproteinase (STE24 homolog, yeast)                                             | 1.166689  | 11.564525  | 1.70E-07 | 0.000226618 |
| 210691_s_at | CACYBP    | calcyclin binding protein                                                                 | 1.175016  | 11.382852  | 2.00E-07 | 0.000257932 |
| 213813_x_at | FTL       | ferritin, light polypeptide                                                               | 1.053770  | 11.361706  | 2.04E-07 | 0.000257932 |
| 214696_at   | MGC14376  |                                                                                           | 2.370277  | 11.340221  | 2.08E-07 | 0.000257932 |
| 229670_at   |           |                                                                                           | -2.711321 | -11.165782 | 2.43E-07 | 0.000293714 |
| 212788_x_at | FTL       | ferritin, light polypeptide                                                               | 1.350563  | 11.129773  | 2.51E-07 | 0.000293714 |
| 200666_s_at | DNAJB1    | DnaJ (Hsp40) homolog, subfamily B, member 1                                               | 2.547562  | 11.124220  | 2.52E-07 | 0.000293714 |
| 200880_at   | DNAJA1    | DnaJ (Hsp40) homolog, subfamily A, member 1                                               | 2.092821  | 11.031222  | 2.75E-07 | 0.000307535 |
| 225191_at   | CIRBP     | cold inducible RNA binding protein                                                        | -1.952989 | -11.028694 | 2.76E-07 | 0.000307535 |
| 228869_at   | SLIC1     |                                                                                           | -1.770294 | -10.974549 | 2.90E-07 | 0.000316827 |
| 200881_s_at | DNAJA1    | DnaJ (Hsp40) homolog, subfamily A, member 1                                               | 1.923709  | 10.885837  | 3.15E-07 | 0.000337268 |
| 226016_at   | CD47      | CD47 antigen (Rh-related antigen, integrin-associated signal transducer)                  | -1.227849 | -10.854848 | 3.24E-07 | 0.000338132 |
| 202636_at   | RNF103    | ring finger protein 103                                                                   | 0.529587  | 10.841854  | 3.28E-07 | 0.000338132 |
| 218366_x_at | FLJ20859  |                                                                                           | -1.411796 | -10.738292 | 3.61E-07 | 0.000365732 |
| 200047_s_at | YY1       | YY1 transcription factor                                                                  | 0.671669  | 10.711805  | 3.70E-07 | 0.000368163 |
| 212009_s_at | STIP1     | stress-induced-phosphoprotein 1 (Hsp70/Hsp90-organizing protein)                          | 2.019671  | 10.688588  | 3.79E-07 | 0.000369608 |
| 225252_at   | SRXN1     | sulfiredoxin 1 homolog (S. cerevisiae)                                                    | 1.940151  | 10.643792  | 3.95E-07 | 0.000378864 |
| 204286_s_at | PMAIP1    | phorbol-12-myristate-13-acetate-induced protein 1                                         | 1.919530  | 10.590784  | 4.15E-07 | 0.000386738 |
| 232024_at   | GIMAP2    | GTPase, IMAP family member 2                                                              | -2.181120 | -10.559078 | 4.28E-07 | 0.000386738 |
| 213187_x_at | FTL       | ferritin, light polypeptide                                                               | 1.524277  | 10.540597  | 4.36E-07 | 0.000386738 |
| 201362_at   | IVNS1ABP  | influenza virus NS1A binding protein                                                      | -1.147069 | -10.538096 | 4.37E-07 | 0.000386738 |
| 209040_s_at | PSMB8     | proteasome (prosome, macropain) subunit, beta type, 8 (large multifunctional peptidase 7) | -1.638898 | -10.533988 | 4.39E-07 | 0.000386738 |
| 226702_at   | LOC129607 |                                                                                           | -3.034766 | -10.477581 | 4.63E-07 | 0.000395795 |
| 218633_x_at | ABHD10    | abhydrolase domain containing 10                                                          | -1.405885 | -10.476765 | 4.63E-07 | 0.000395795 |
| 200895_s_at | FKBP4     | FK506 binding protein 4, 59kDa                                                            | 1.756847  | 10.433491  | 4.83E-07 | 0.000397547 |
| 219498_s_at | BCL11A    | B-cell CLL/lymphoma 11A (zinc finger protein)                                             | -2.533873 | -10.430013 | 4.85E-07 | 0.000397547 |
| 205133_s_at | HSPE1     | heat shock 10kDa protein 1 (chaperonin 10)                                                | 1.738301  | 10.421716  | 4.89E-07 | 0.000397547 |
| 208980_s_at | UBC       | ubiquitin C                                                                               | 1.106441  | 10.409308  | 4.94E-07 | 0.000397547 |
| 203811_s_at | DNAJB4    | DnaJ (Hsp40) homolog, subfamily B, member 4                                               | 2.493948  | 10.375352  | 5.11E-07 | 0.000404878 |
| 200064_at   | HSP90AB1  | heat shock protein 90kDa alpha (cytosolic), class B member 1                              | 1.090934  | 10.330457  | 5.34E-07 | 0.000416878 |
| 226743_at   | FLJ34922  |                                                                                           | -1.555100 | -10.298692 | 5.50E-07 | 0.000423924 |
| 226565_at   | TMEM99    | transmembrane protein 99                                                                  | 0.677681  | 10.284249  | 5.58E-07 | 0.000423969 |

|              |            |                                                                                                                  |           |            |          |             |
|--------------|------------|------------------------------------------------------------------------------------------------------------------|-----------|------------|----------|-------------|
| 211628_x_at  | FTHP1      | ferritin, heavy polypeptide pseudogene 1                                                                         | 1.115844  | 10.254346  | 5.75E-07 | 0.000430567 |
| 201328_at    | ETS2       | v-ets erythroblastosis virus E26 oncogene homolog 2 (avian)                                                      | -2.374021 | -10.221006 | 5.94E-07 | 0.00043486  |
| 212560_at    | SORL1      | sortilin-related receptor, L(DLR class) A repeats-containing                                                     | -3.035602 | -10.216655 | 5.97E-07 | 0.00043486  |
| 236140_at    | GCLM       | glutamate-cysteine ligase, modifier subunit                                                                      | 3.281077  | 10.166387  | 6.27E-07 | 0.000450895 |
| 224836_at    | TP53INP2   | tumor protein p53 inducible nuclear protein 2                                                                    | 1.480018  | 10.148573  | 6.38E-07 | 0.000452929 |
| 232077_s_at  | YPEL3      | yippee-like 3 (Drosophila)                                                                                       | -0.945766 | -10.063625 | 6.94E-07 | 0.000486379 |
| 222891_s_at  | BCL11A     | B-cell CLL/lymphoma 11A (zinc finger protein)                                                                    | -1.849530 | -10.035498 | 7.14E-07 | 0.00049015  |
| 1554577_a_at | PSMD10     | proteasome (prosome, macropain) 26S subunit, non-ATPase, 10                                                      | 0.510416  | 10.030431  | 7.17E-07 | 0.00049015  |
| 218566_s_at  | CHORDC1    | cysteine and histidine-rich domain (CHORD)-containing 1                                                          | 1.645949  | 9.994530   | 7.43E-07 | 0.000495697 |
| 205051_s_at  | KIT        | v-kit Hardy-Zuckerman 4 feline sarcoma viral oncogene homolog                                                    | -2.212568 | -9.994423  | 7.43E-07 | 0.000495697 |
| 212714_at    | LARP4      | La ribonucleoprotein domain family, member 4                                                                     | 1.284338  | 9.948774   | 7.78E-07 | 0.000504874 |
| 201266_at    | TXNRD1     | thioredoxin reductase 1                                                                                          | 1.129675  | 9.947433   | 7.79E-07 | 0.000504874 |
| 208868_s_at  | GABARA PL1 | GABA(A) receptor-associated protein like 1                                                                       | 0.842676  | 9.940252   | 7.85E-07 | 0.000504874 |
| 201009_s_at  | TXNIP      | thioredoxin interacting protein                                                                                  | -1.795640 | -9.898184  | 8.19E-07 | 0.000516447 |
| 242123_at    | PAQR7      | progesterone and adipoQ receptor family member VII                                                               | -1.076242 | -9.894608  | 8.22E-07 | 0.000516447 |
| 238480_at    | C18orf17   | chromosome 18 open reading frame 17                                                                              | -2.277150 | -9.864401  | 8.47E-07 | 0.000526383 |
| 236224_at    | RIT1       | Ras-like without CAAX 1                                                                                          | 1.355777  | 9.845298   | 8.64E-07 | 0.00053062  |
| 212144_at    | UNC84B     | unc-84 homolog B (C. elegans)                                                                                    | -0.822789 | -9.804295  | 9.00E-07 | 0.000546996 |
| 205400_at    | WAS        | Wiskott-Aldrich syndrome (eczema-thrombocytopenia)                                                               | -0.536993 | -9.760961  | 9.41E-07 | 0.000560683 |
| 201994_at    | MORF4L2    | mortality factor 4 like 2                                                                                        | 0.707558  | 9.758401   | 9.43E-07 | 0.000560683 |
| 203528_at    | SEMA4D     | sema domain, immunoglobulin domain (Ig), transmembrane domain (TM) and short cytoplasmic domain, (semaphorin) 4D | -1.604594 | -9.718233  | 9.83E-07 | 0.000577876 |
| 225081_s_at  | CDCA7L     | cell division cycle associated 7-like                                                                            | -1.392253 | -9.697686  | 1.00E-06 | 0.000583881 |
| 201381_x_at  | CACYBP     | calcyclin binding protein                                                                                        | 1.631961  | 9.671271   | 1.03E-06 | 0.000593601 |
| 201471_s_at  | SQSTM1     | sequestosome 1                                                                                                   | 0.917402  | 9.628807   | 1.08E-06 | 0.000613644 |
| 203445_s_at  | CTDSP2     | CTD (carboxy-terminal domain, RNA polymerase II, polypeptide A) small phosphatase 2                              | -0.935582 | -9.610915  | 1.10E-06 | 0.000618626 |
| 225917_at    |            |                                                                                                                  | -0.907996 | -9.578052  | 1.14E-06 | 0.000633466 |
| 208667_s_at  | ST13       | suppression of tumorigenicity 13 (colon carcinoma) (Hsp70 interacting protein)                                   | 1.194077  | 9.552740   | 1.17E-06 | 0.000643727 |
| 226750_at    | LARP2      | La ribonucleoprotein domain family, member 2                                                                     | 1.437910  | 9.542048   | 1.18E-06 | 0.000644398 |
| 204341_at    | TRIM16     | tripartite motif-containing 16                                                                                   | 1.392230  | 9.504841   | 1.23E-06 | 0.00066318  |
| 48106_at     | FLJ20489   |                                                                                                                  | 1.255687  | 9.449364   | 1.30E-06 | 0.000695822 |
| 235573_at    | HSPH1      | heat shock 105kDa/110kDa protein 1                                                                               | 2.298647  | 9.321163   | 1.49E-06 | 0.000788536 |
| 213005_s_at  | ANKRD15    | ankyrin repeat domain 15                                                                                         | -2.334785 | -9.311457  | 1.50E-06 | 0.000789015 |
| 218543_s_at  | PARP12     | poly (ADP-ribose) polymerase family, member 12                                                                   | -2.183479 | -9.244246  | 1.61E-06 | 0.000839291 |
| 224346_at    |            |                                                                                                                  | 1.459265  | 9.220026   | 1.65E-06 | 0.00085311  |

|             |           |                                                                                                |           |           |          |             |
|-------------|-----------|------------------------------------------------------------------------------------------------|-----------|-----------|----------|-------------|
| 221952_x_at | TRMT5     | TRM5 tRNA methyltransferase 5 homolog (S. cerevisiae)                                          | -0.579579 | -9.090627 | 1.90E-06 | 0.000970974 |
| 204205_at   | APOBEC3 G | apolipoprotein B mRNA editing enzyme, catalytic polypeptide-like 3G                            | -1.827221 | -9.071952 | 1.94E-06 | 0.000981574 |
| 200996_at   | ACTR3     | ARP3 actin-related protein 3 homolog (yeast)                                                   | 0.581828  | 9.017574  | 2.06E-06 | 0.001031562 |
| 208786_s_at | MAP1LC3 B | microtubule-associated protein 1 light chain 3 beta                                            | 0.980090  | 8.980922  | 2.14E-06 | 0.001049228 |
| 200070_at   | C2orf24   | chromosome 2 open reading frame 24                                                             | 0.637644  | 8.970420  | 2.16E-06 | 0.001049228 |
| 223528_s_at | FLJ20859  |                                                                                                | -1.587353 | -8.969919 | 2.17E-06 | 0.001049228 |
| 223988_x_at | FLJ20859  |                                                                                                | -1.430877 | -8.968833 | 2.17E-06 | 0.001049228 |
| 208706_s_at | EIF5      | eukaryotic translation initiation factor 5                                                     | 0.705113  | 8.934304  | 2.25E-06 | 0.001079977 |
| 1570552_at  | C18orf50  | chromosome 18 open reading frame 50                                                            | -1.948226 | -8.892708 | 2.36E-06 | 0.001099797 |
| 221004_s_at | ITM2C     | integral membrane protein 2C                                                                   | -1.200402 | -8.885527 | 2.38E-06 | 0.001099797 |
| 202883_s_at | PPP2R1B   | protein phosphatase 2 (formerly 2A), regulatory subunit A (PR 65), beta isoform                | 1.239607  | 8.875959  | 2.40E-06 | 0.001099797 |
| 201010_s_at | TXNIP     | thioredoxin interacting protein                                                                | -2.003750 | -8.867389 | 2.42E-06 | 0.001099797 |
| 226541_at   | FBXO30    | F-box protein 30                                                                               | 1.665057  | 8.866891  | 2.42E-06 | 0.001099797 |
| 203925_at   | GCLM      | glutamate-cysteine ligase, modifier subunit                                                    | 2.287557  | 8.865071  | 2.43E-06 | 0.001099797 |
| 210347_s_at | BCL11A    | B-cell CLL/lymphoma 11A (zinc finger protein)                                                  | -2.626890 | -8.857655 | 2.45E-06 | 0.001099797 |
| 221688_s_at | IMP3      | IMP3, U3 small nucleolar ribonucleoprotein, homolog (yeast)                                    | -1.219941 | -8.855909 | 2.45E-06 | 0.001099797 |
| 232052_at   | LOC440944 |                                                                                                | 0.910454  | 8.844332  | 2.49E-06 | 0.001104855 |
| 226757_at   | IFIT2     | interferon-induced protein with tetratricopeptide repeats 2                                    | -3.029297 | -8.821869 | 2.55E-06 | 0.00112344  |
| 1567219_at  | ELOVL5    | ELOVL family member 5, elongation of long chain fatty acids (FEN1/Elo2, SUR4/Elo3-like, yeast) | 0.565866  | 8.782879  | 2.66E-06 | 0.001159264 |
| 210027_s_at | APEX1     | APEX nuclease (multifunctional DNA repair enzyme) 1                                            | -1.413045 | -8.777091 | 2.68E-06 | 0.001159264 |
| 229754_at   | TMEM44    | transmembrane protein 44                                                                       | -0.661578 | -8.771900 | 2.69E-06 | 0.001159264 |
| 225644_at   | FLJ33814  |                                                                                                | 1.127714  | 8.738012  | 2.80E-06 | 0.001194324 |
| 229519_at   | FXR1      | fragile X mental retardation, autosomal homolog 1                                              | 1.364556  | 8.684154  | 2.97E-06 | 0.001250503 |
| 211761_s_at | CACYBP    | calcyclin binding protein                                                                      | 1.444674  | 8.679479  | 2.98E-06 | 0.001250503 |
| 214950_at   | IL9R      | interleukin 9 receptor                                                                         | -1.723504 | -8.676031 | 3.00E-06 | 0.001250503 |
| 219777_at   | GIMAP6    | GTPase, IMAP family member 6                                                                   | -3.393255 | -8.668444 | 3.02E-06 | 0.001251608 |
| 212457_at   | TFE3      | transcription factor binding to IGHM enhancer 3                                                | 1.427368  | 8.596168  | 3.28E-06 | 0.001347203 |
| 203037_s_at | MTSS1     | metastasis suppressor 1                                                                        | -1.927279 | -8.582141 | 3.33E-06 | 0.001358456 |
| 225284_at   | DNAJC3    | DnaJ (Hsp40) homolog, subfamily C, member 3                                                    | 1.020132  | 8.571843  | 3.37E-06 | 0.001364152 |
| 213101_s_at | ACTR3     | ARP3 actin-related protein 3 homolog (yeast)                                                   | 0.498459  | 8.564116  | 3.40E-06 | 0.001365988 |
| 225670_at   | LOC134145 |                                                                                                | 1.729676  | 8.506865  | 3.63E-06 | 0.001444261 |
| 225268_at   | KPNA4     | karyopherin alpha 4 (importin alpha 3)                                                         | 0.903559  | 8.502036  | 3.65E-06 | 0.001444261 |
| 228333_at   |           |                                                                                                | -1.503114 | -8.461595 | 3.82E-06 | 0.001491918 |

|              |           |                                                                                          |           |           |          |             |
|--------------|-----------|------------------------------------------------------------------------------------------|-----------|-----------|----------|-------------|
| 213532_at    | ADAM17    | ADAM metallopeptidase domain 17 (tumor necrosis factor, alpha, converting enzyme)        | 1.133516  | 8.460861  | 3.82E-06 | 0.001491918 |
| 209770_at    | BTN3A1    | butyrophilin, subfamily 3, member A1                                                     | -1.994157 | -8.452707 | 3.86E-06 | 0.001495177 |
| 208021_s_at  | RFC1      | replication factor C (activator 1) 1, 145kDa                                             | -1.041017 | -8.433642 | 3.94E-06 | 0.00151732  |
| 218802_at    | FLJ20647  |                                                                                          | -0.827663 | -8.415105 | 4.03E-06 | 0.001537693 |
| 202899_s_at  | SFRS3     | splicing factor, arginine/serine-rich 3                                                  | 0.911329  | 8.404410  | 4.07E-06 | 0.001537693 |
| 204249_s_at  | LMO2      | LIM domain only 2 (rhombotin-like 1)                                                     | -1.572033 | -8.403717 | 4.08E-06 | 0.001537693 |
| 201437_s_at  | EIF4E     | eukaryotic translation initiation factor 4E                                              | 0.286880  | 8.393486  | 4.13E-06 | 0.001545177 |
| 228153_at    | IBRDC2    | IBR domain containing 2                                                                  | -1.929828 | -8.373055 | 4.22E-06 | 0.001571087 |
| 200810_s_at  | CIRBP     | cold inducible RNA binding protein                                                       | -0.872151 | -8.354070 | 4.32E-06 | 0.001594915 |
| 213895_at    | EMP1      | epithelial membrane protein 1                                                            | 1.337966  | 8.313679  | 4.52E-06 | 0.001635212 |
| 218284_at    | SMAD3     | SMAD, mothers against DPP homolog 3 (Drosophila)                                         | -1.623661 | -8.304482 | 4.57E-06 | 0.001635212 |
| 201586_s_at  | SFPQ      | splicing factor proline/glutamine-rich (polypyrimidine tract binding protein associated) | 0.569491  | 8.293045  | 4.63E-06 | 0.001635212 |
| 227052_at    | LOC201895 |                                                                                          | -1.616678 | -8.291772 | 4.64E-06 | 0.001635212 |
| 216262_s_at  | TGIF2     | TGFB-induced factor 2 (TALE family homeobox)                                             | -0.882673 | -8.284495 | 4.68E-06 | 0.001635212 |
| 201008_s_at  | TXNIP     | thioredoxin interacting protein                                                          | -2.155261 | -8.283849 | 4.68E-06 | 0.001635212 |
| 209761_s_at  | SP110     | SP110 nuclear body protein                                                               | -1.217201 | -8.277150 | 4.72E-06 | 0.001635212 |
| 219122_s_at  | ICF45     |                                                                                          | -0.682983 | -8.275380 | 4.73E-06 | 0.001635212 |
| 209026_x_at  | TUBB      | tubulin, beta                                                                            | -1.096803 | -8.274125 | 4.73E-06 | 0.001635212 |
| 37796_at     | LRCH4     | leucine-rich repeats and calponin homology (CH) domain containing 4                      | -0.362550 | -8.270586 | 4.75E-06 | 0.001635212 |
| 214205_x_at  | TXNL2     | thioredoxin-like 2                                                                       | 0.355600  | 8.270419  | 4.76E-06 | 0.001635212 |
| 208290_s_at  | EIF5      | eukaryotic translation initiation factor 5                                               | 1.867168  | 8.256128  | 4.83E-06 | 0.001652164 |
| 224415_s_at  | HINT2     | histidine triad nucleotide binding protein 2                                             | -0.863288 | -8.245075 | 4.90E-06 | 0.001663123 |
| 217980_s_at  | MRPL16    | mitochondrial ribosomal protein L16                                                      | -1.038069 | -8.228752 | 4.99E-06 | 0.001668344 |
| 1555916_at   | RPUSD3    | RNA pseudouridylation synthase domain containing 3                                       | 0.786972  | 8.227161  | 5.00E-06 | 0.001668344 |
| 1555847_a_at | LOC284454 |                                                                                          | 1.266218  | 8.213213  | 5.08E-06 | 0.001668344 |
| 210519_s_at  | NQO1      | NAD(P)H dehydrogenase, quinone 1                                                         | 1.752994  | 8.212992  | 5.08E-06 | 0.001668344 |
| 225177_at    | RAB11FIP1 | RAB11 family interacting protein 1 (class I)                                             | -1.253760 | -8.212877 | 5.08E-06 | 0.001668344 |
| 209921_at    | SLC7A11   | solute carrier family 7, (cationic amino acid transporter, y+ system) member 11          | 3.120008  | 8.210952  | 5.10E-06 | 0.001668344 |
| 200789_at    | ECH1      | enoyl Coenzyme A hydratase 1, peroxisomal                                                | -0.626922 | -8.199215 | 5.17E-06 | 0.001681275 |
| 201310_s_at  | C5orf13   | chromosome 5 open reading frame 13                                                       | -2.015621 | -8.192152 | 5.21E-06 | 0.001683766 |
| 222161_at    | NAALAD2   | N-acetylated alpha-linked acidic dipeptidase 2                                           | 0.933408  | 8.187813  | 5.24E-06 | 0.001683766 |
| 217882_at    | TMEM111   | transmembrane protein 111                                                                | 2.264750  | 8.094817  | 5.84E-06 | 0.001866906 |
| 210648_x_at  | SNX3      | sorting nexin 3                                                                          | 0.531289  | 8.083776  | 5.92E-06 | 0.001873047 |
| 230741_at    |           |                                                                                          | -2.169513 | -8.082169 | 5.93E-06 | 0.001873047 |

|             |           |                                                                                   |           |           |          |             |
|-------------|-----------|-----------------------------------------------------------------------------------|-----------|-----------|----------|-------------|
| 225267_at   | KPNA4     | karyopherin alpha 4 (importin alpha 3)                                            | 0.815184  | 8.074943  | 5.98E-06 | 0.00187823  |
| 201773_at   | ADNP      | activity-dependent neuroprotector                                                 | -0.727924 | -8.052110 | 6.14E-06 | 0.001904233 |
| 222977_at   | SURF4     | surfeit 4                                                                         | 1.079584  | 8.050375  | 6.15E-06 | 0.001904233 |
| 226756_at   | FLJ36031  |                                                                                   | -1.877742 | -8.048613 | 6.17E-06 | 0.001904233 |
| 203879_at   | PIK3CD    | phosphoinositide-3-kinase, catalytic, delta polypeptide                           | -0.863701 | -8.044084 | 6.20E-06 | 0.001904233 |
| 209083_at   | CORO1A    | coronin, actin binding protein, 1A                                                | -0.819718 | -8.028832 | 6.31E-06 | 0.001925111 |
| 223464_at   | OSBPL5    | oxysterol binding protein-like 5                                                  | -0.720796 | -8.025449 | 6.34E-06 | 0.001925111 |
| 219497_s_at | BCL11A    | B-cell CLL/lymphoma 11A (zinc finger protein)                                     | -2.264249 | -8.020712 | 6.37E-06 | 0.001925262 |
| 230795_at   | HIST2H4   | histone 2, H4                                                                     | -1.174741 | -8.010417 | 6.45E-06 | 0.001938223 |
| 218689_at   | FANCF     | Fanconi anemia, complementation group F                                           | -2.083894 | -7.992489 | 6.59E-06 | 0.001969139 |
| 207168_s_at | H2AFY     | H2A histone family, member Y                                                      | -0.426183 | -7.982239 | 6.67E-06 | 0.001982471 |
| 228583_at   | C14orf46  | chromosome 14 open reading frame 46                                               | 0.556877  | 7.975856  | 6.72E-06 | 0.001986798 |
| 226659_at   | DEF6      | differentially expressed in FDCP 6 homolog (mouse)                                | -0.961355 | -7.969703 | 6.77E-06 | 0.001990657 |
| 200651_at   | GNB2L1    | guanine nucleotide binding protein (G protein), beta polypeptide 2-like 1         | -0.476724 | -7.946573 | 6.96E-06 | 0.002034781 |
| 205180_s_at | ADAM8     | ADAM metallopeptidase domain 8                                                    | -0.850562 | -7.942369 | 7.00E-06 | 0.002034781 |
| 204040_at   | RNF144    | ring finger protein 144                                                           | -2.199367 | -7.934117 | 7.07E-06 | 0.002044078 |
| 209357_at   | CITED2    | Cbp/p300-interacting transactivator, with Glu/Asp-rich carboxy-terminal domain, 2 | -1.990902 | -7.913897 | 7.24E-06 | 0.002083127 |
| 219209_at   | IFIH1     | interferon induced with helicase C domain 1                                       | -2.096475 | -7.903046 | 7.33E-06 | 0.002099345 |
| 208708_x_at | EIF5      | eukaryotic translation initiation factor 5                                        | 1.988537  | 7.890357  | 7.45E-06 | 0.00210943  |
| 230142_s_at | CIRBP     | cold inducible RNA binding protein                                                | -1.420755 | -7.889906 | 7.45E-06 | 0.00210943  |
| 241418_at   | LOC344887 |                                                                                   | 1.961167  | 7.886067  | 7.48E-06 | 0.00210943  |
| 216384_x_at | LOC440085 |                                                                                   | -0.729223 | -7.877701 | 7.56E-06 | 0.002119811 |
| 200748_s_at | FTH1      | ferritin, heavy polypeptide 1                                                     | 1.168571  | 7.872595  | 7.61E-06 | 0.002121983 |
| 202950_at   | CRYZ      | crystallin, zeta (quinone reductase)                                              | 1.550771  | 7.864413  | 7.68E-06 | 0.002129989 |
| 211015_s_at | HSPA4     | heat shock 70kDa protein 4                                                        | 0.894915  | 7.861027  | 7.71E-06 | 0.002129989 |
| 209383_at   | DDIT3     | DNA-damage-inducible transcript 3                                                 | 1.619052  | 7.843176  | 7.88E-06 | 0.002165357 |
| 200691_s_at | HSPA9B    | heat shock 70kDa protein 9B (mortalin-2)                                          | 1.159490  | 7.822986  | 8.08E-06 | 0.002207674 |
| 200912_s_at | EIF4A2    | eukaryotic translation initiation factor 4A, isoform 2                            | -0.508905 | -7.811920 | 8.18E-06 | 0.002226269 |
| 230082_at   | LRRFIP2   | leucine rich repeat (in FLII) interacting protein 2                               | 0.660210  | 7.799438  | 8.31E-06 | 0.002248957 |
| 230171_at   | UBE2D3    | ubiquitin-conjugating enzyme E2D 3 (UBC4/5 homolog, yeast)                        | 0.361326  | 7.781244  | 8.49E-06 | 0.002287761 |
| 243463_s_at | RIT1      | Ras-like without CAAX 1                                                           | 1.629326  | 7.764711  | 8.67E-06 | 0.002322684 |
| 200668_s_at | UBE2D3    | ubiquitin-conjugating enzyme E2D 3 (UBC4/5 homolog, yeast)                        | 0.451252  | 7.755873  | 8.76E-06 | 0.002336308 |
| 228275_at   |           |                                                                                   | -1.555537 | -7.743553 | 8.89E-06 | 0.002360068 |
| 203983_at   | TSNAX     | translin-associated factor X                                                      | -0.893013 | -7.738356 | 8.95E-06 | 0.002363571 |
| 224923_at   | TTC7A     | tetratricopeptide repeat domain 7A                                                | -0.615909 | -7.731705 | 9.02E-06 | 0.002371337 |

|             |             |                                                                                          |           |           |          |             |
|-------------|-------------|------------------------------------------------------------------------------------------|-----------|-----------|----------|-------------|
| 226530_at   | BMF         | Bcl2 modifying factor                                                                    | -1.624084 | -7.721864 | 9.13E-06 | 0.002388467 |
| 217329_x_at |             |                                                                                          | 0.461771  | 7.667938  | 9.75E-06 | 0.00253907  |
| 228996_at   | RC3H1       | ring finger and CCCH-type zinc finger domains 1                                          | 1.295621  | 7.655825  | 9.90E-06 | 0.00254767  |
| 215963_x_at | RPL3        | ribosomal protein L3                                                                     | -0.326570 | -7.654272 | 9.92E-06 | 0.00254767  |
| 201585_s_at | SFPQ        | splicing factor proline/glutamine-rich (polypyrimidine tract binding protein associated) | 0.496303  | 7.653614  | 9.93E-06 | 0.00254767  |
| 200642_at   | SOD1        | superoxide dismutase 1, soluble (amyotrophic lateral sclerosis 1 (adult))                | 1.560764  | 7.646234  | 1.00E-05 | 0.002552818 |
| 208696_at   | CCT5        | chaperonin containing TCP1, subunit 5 (epsilon)                                          | 0.856799  | 7.644356  | 1.00E-05 | 0.002552818 |
| 223132_s_at | TRIM8       | tripartite motif-containing 8                                                            | -0.941291 | -7.628808 | 1.02E-05 | 0.002590025 |
| 208666_s_at | ST13        | suppression of tumorigenicity 13 (colon carcinoma) (Hsp70 interacting protein)           | 1.257785  | 7.603985  | 1.05E-05 | 0.002653425 |
| 230127_at   |             |                                                                                          | 3.006945  | 7.601686  | 1.06E-05 | 0.002653425 |
| 210715_s_at | SPINT2      | serine peptidase inhibitor, Kunitz type, 2                                               | -0.474427 | -7.596719 | 1.06E-05 | 0.002657538 |
| 203010_at   | STAT5A      | signal transducer and activator of transcription 5A                                      | -0.689855 | -7.586674 | 1.08E-05 | 0.002678459 |
| 211686_s_at | RBM13       | RNA binding motif protein 13                                                             | -1.286709 | -7.576692 | 1.09E-05 | 0.002699423 |
| 224558_s_at | MALAT1      | metastasis associated lung adenocarcinoma transcript 1 (non-coding RNA)                  | -1.157176 | -7.569750 | 1.10E-05 | 0.002703138 |
| 240064_at   | SELPLG      | selectin P ligand                                                                        | -0.891814 | -7.565209 | 1.11E-05 | 0.002703138 |
| 218259_at   | MKL2        | MKL/myocardin-like 2                                                                     | -1.514023 | -7.564676 | 1.11E-05 | 0.002703138 |
| 208549_x_at | LOC440085   |                                                                                          | -0.712696 | -7.548793 | 1.13E-05 | 0.002744574 |
| 206067_s_at | WT1         | Wilms tumor 1                                                                            | -1.831144 | -7.538326 | 1.14E-05 | 0.002752853 |
| 222988_s_at | TMEM9       | transmembrane protein 9                                                                  | -0.615583 | -7.536172 | 1.15E-05 | 0.002752853 |
| 211509_s_at | RTN4        | reticulon 4                                                                              | 0.605525  | 7.535682  | 1.15E-05 | 0.002752853 |
| 229390_at   | RP1-93H18.5 |                                                                                          | -1.474251 | -7.521321 | 1.17E-05 | 0.002790134 |
| 222129_at   | C2orf17     | chromosome 2 open reading frame 17                                                       | -0.689500 | -7.500154 | 1.20E-05 | 0.002827175 |
| 200977_s_at | TAX1BP1     | Tax1 (human T-cell leukemia virus type I) binding protein 1                              | 0.688179  | 7.500039  | 1.20E-05 | 0.002827175 |
| 208985_s_at | EIF3S1      | eukaryotic translation initiation factor 3, subunit 1 alpha, 35kDa                       | 0.967209  | 7.499630  | 1.20E-05 | 0.002827175 |
| 215313_x_at | HLA-A       | major histocompatibility complex, class I, A                                             | -0.531866 | -7.494609 | 1.21E-05 | 0.002827175 |
| 208672_s_at | SFRS3       | splicing factor, arginine/serine-rich 3                                                  | 0.389004  | 7.493356  | 1.21E-05 | 0.002827175 |
| 225562_at   | RASA3       | RAS p21 protein activator 3                                                              | -1.357878 | -7.473379 | 1.24E-05 | 0.002877229 |
| 210045_at   | IDH2        | isocitrate dehydrogenase 2 (NADP+), mitochondrial                                        | -0.926205 | -7.471932 | 1.24E-05 | 0.002877229 |
| 208698_s_at | NONO        | non-POU domain containing, octamer-binding                                               | -0.620390 | -7.469066 | 1.25E-05 | 0.002877229 |
| 225793_at   | LIX1L       | Lix1 homolog (mouse) like                                                                | -1.201924 | -7.461178 | 1.26E-05 | 0.002893505 |
| 231004_s_at | H1FX        | H1 histone family, member X                                                              | -1.471258 | -7.442212 | 1.29E-05 | 0.00295055  |
| 202813_at   | TARBP1      | Tar (HIV-1) RNA binding protein 1                                                        | -1.329369 | -7.433280 | 1.30E-05 | 0.00296957  |
| 218684_at   | LRRRC8D     | leucine rich repeat containing 8 family, member D                                        | -0.666012 | -7.427497 | 1.31E-05 | 0.00296957  |
| 223497_at   | KIAA1411    | KIAA1411                                                                                 | -1.154861 | -7.425239 | 1.32E-05 | 0.00296957  |
| 212723_at   | PTDSR       | phosphatidylserine receptor                                                              | 1.472682  | 7.423832  | 1.32E-05 | 0.00296957  |
| 235317_at   | LOC284454   |                                                                                          | 0.859262  | 7.407663  | 1.35E-05 | 0.003018005 |
| 201795_at   | LBR         | lamin B receptor                                                                         | 0.681728  | 7.403908  | 1.35E-05 | 0.003019897 |
| 1554557_at  | ATP11B      | ATPase, Class VI, type 11B                                                               | 0.722244  | 7.398927  | 1.36E-05 | 0.003026501 |

|              |           |                                                                                                |           |           |          |             |
|--------------|-----------|------------------------------------------------------------------------------------------------|-----------|-----------|----------|-------------|
| 217678_at    | SLC7A11   | solute carrier family 7, (cationic amino acid transporter, y+ system) member 11                | 2.853323  | 7.381670  | 1.39E-05 | 0.003080381 |
| 201972_at    | ATP6V1A   | ATPase, H+ transporting, lysosomal 70kDa, V1 subunit A                                         | 0.526200  | 7.369090  | 1.41E-05 | 0.003100751 |
| 214359_s_at  | HSP90AB1  | heat shock protein 90kDa alpha (cytosolic), class B member 1                                   | 1.269671  | 7.366106  | 1.42E-05 | 0.003100751 |
| 209543_s_at  | CD34      | CD34 antigen                                                                                   | -1.378334 | -7.364523 | 1.42E-05 | 0.003100751 |
| 215800_at    | DUOX1     | dual oxidase 1                                                                                 | 0.171109  | 7.362560  | 1.43E-05 | 0.003100751 |
| 222985_at    | YWHAG     | tyrosine 3-monooxygenase/tryptophan 5-monooxygenase activation protein, gamma polypeptide      | 0.306360  | 7.360533  | 1.43E-05 | 0.003100751 |
| 213385_at    | CHN2      | chimerin (chimaerin) 2                                                                         | -1.558444 | -7.352743 | 1.44E-05 | 0.003118999 |
| 225699_at    | LOC285958 |                                                                                                | -1.094899 | -7.341184 | 1.46E-05 | 0.003143405 |
| 209337_at    | PSIP1     | PC4 and SFRS1 interacting protein 1                                                            | -1.626469 | -7.340335 | 1.47E-05 | 0.003143405 |
| 204821_at    | BTN3A3    | butyrophilin, subfamily 3, member A3                                                           | -1.568819 | -7.333352 | 1.48E-05 | 0.003158885 |
| 200087_s_at  | TMED2     | transmembrane emp24 domain trafficking protein 2                                               | 0.343877  | 7.323571  | 1.50E-05 | 0.003185767 |
| 204806_x_at  | HLA-F     | major histocompatibility complex, class I, F                                                   | -0.637230 | -7.293269 | 1.56E-05 | 0.003297662 |
| 228762_at    | LFNG      | lunatic fringe homolog (Drosophila)                                                            | -1.219440 | -7.274949 | 1.59E-05 | 0.003362275 |
| 1569003_at   | TMEM49    | transmembrane protein 49                                                                       | 1.099477  | 7.261146  | 1.62E-05 | 0.003405031 |
| 201005_at    | CD9       | CD9 antigen (p24)                                                                              | -1.207330 | -7.258971 | 1.63E-05 | 0.003405031 |
| 200940_s_at  | RERE      | arginine-glutamic acid dipeptide (RE) repeats                                                  | -1.117150 | -7.231275 | 1.68E-05 | 0.003502013 |
| 202644_s_at  | TNFAIP3   | tumor necrosis factor, alpha-induced protein 3                                                 | -1.022687 | -7.230957 | 1.68E-05 | 0.003502013 |
| 1559530_at   | BLOC1S3   | biogenesis of lysosome-related organelles complex-1, subunit 3                                 | 0.363337  | 7.224139  | 1.70E-05 | 0.003519258 |
| 201746_at    | TP53      | tumor protein p53 (Li-Fraumeni syndrome)                                                       | -0.549209 | -7.216663 | 1.72E-05 | 0.003539636 |
| 212295_s_at  | SLC7A1    | solute carrier family 7 (cationic amino acid transporter, y+ system), member 1                 | 0.851962  | 7.209008  | 1.73E-05 | 0.003561019 |
| 206649_s_at  | TFE3      | transcription factor binding to IGHM enhancer 3                                                | 0.775786  | 7.204757  | 1.74E-05 | 0.00356703  |
| 204236_at    | FLI1      | Friend leukemia virus integration 1                                                            | -1.636723 | -7.198369 | 1.76E-05 | 0.003582904 |
| 218005_at    | ZNF22     | zinc finger protein 22 (KOX 15)                                                                | -0.674694 | -7.191187 | 1.77E-05 | 0.00360091  |
| 209306_s_at  | SWAP70    |                                                                                                | 1.200703  | 7.187243  | 1.78E-05 | 0.00360091  |
| 212856_at    | DIP       |                                                                                                | -0.814637 | -7.185769 | 1.78E-05 | 0.00360091  |
| 225704_at    | KIAA1545  |                                                                                                | -1.197164 | -7.181474 | 1.79E-05 | 0.003607486 |
| 228490_at    | ABHD2     | abhydrolase domain containing 2                                                                | 1.045084  | 7.169442  | 1.82E-05 | 0.003650207 |
| 207543_s_at  | P4HA1     | procollagen-proline, 2-oxoglutarate 4-dioxygenase (proline 4-hydroxylase), alpha polypeptide I | 1.030090  | 7.156721  | 1.85E-05 | 0.003696817 |
| 212414_s_at  | 6-Sep     | septin 6                                                                                       | -0.969625 | -7.150656 | 1.87E-05 | 0.00369917  |
| 1552585_s_at | ALF       |                                                                                                | 0.189406  | 7.150571  | 1.87E-05 | 0.00369917  |
| 219218_at    | BAHCC1    | BAH domain and coiled-coil containing 1                                                        | -0.881645 | -7.147649 | 1.87E-05 | 0.003699697 |
| 223156_at    | MRPS23    | mitochondrial ribosomal protein S23                                                            | -0.894093 | -7.132323 | 1.91E-05 | 0.003759866 |
| 202859_x_at  | IL8       | interleukin 8                                                                                  | 1.918658  | 7.119395  | 1.94E-05 | 0.003809361 |



|             |            |                                                                                                              |           |           |          |             |
|-------------|------------|--------------------------------------------------------------------------------------------------------------|-----------|-----------|----------|-------------|
| 209326_at   | SLC35A2    | solute carrier family 35 (UDP-galactose transporter), member A2                                              | 0.651022  | 7.099734  | 1.99E-05 | 0.003893368 |
| 228138_at   | ZNF498     | zinc finger protein 498                                                                                      | -0.792068 | -7.094529 | 2.01E-05 | 0.003905707 |
| 224990_at   | LOC201895  |                                                                                                              | -1.005297 | -7.087405 | 2.03E-05 | 0.003927854 |
| 202477_s_at | TUBGCP2    | tubulin, gamma complex associated protein 2                                                                  | -0.452174 | -7.084678 | 2.03E-05 | 0.003927854 |
| 214629_x_at | RTN4       | reticulon 4                                                                                                  | 0.687133  | 7.075251  | 2.06E-05 | 0.003938174 |
| 227144_at   | C22orf9    | chromosome 22 open reading frame 9                                                                           | -1.228929 | -7.074678 | 2.06E-05 | 0.003938174 |
| 228394_at   | STK10      | serine/threonine kinase 10                                                                                   | -1.035618 | -7.074509 | 2.06E-05 | 0.003938174 |
| 224603_at   | ST6GALNAC2 | ST6 (alpha-N-acetylneuraminyl-2,3-beta-galactosyl-1,3)-N-acetylgalactosaminide alpha-2,6-sialyltransferase 2 | -0.938752 | -7.071197 | 2.07E-05 | 0.003941336 |
| 201144_s_at | EIF2S1     | eukaryotic translation initiation factor 2, subunit 1 alpha, 35kDa                                           | 0.818817  | 7.062196  | 2.09E-05 | 0.003962695 |
| 203349_s_at | ETV5       | ets variant gene 5 (ets-related molecule)                                                                    | 0.647650  | 7.061673  | 2.09E-05 | 0.003962695 |
| 217758_s_at | SMBP       |                                                                                                              | 0.389678  | 7.051791  | 2.12E-05 | 0.004000007 |
| 226481_at   | VPRBP      | Vpr (HIV-1) binding protein                                                                                  | 0.597595  | 7.044695  | 2.14E-05 | 0.004023173 |
| 208668_x_at | HMGN2      | high-mobility group nucleosomal binding domain 2                                                             | -0.504991 | -7.038543 | 2.16E-05 | 0.004041583 |
| 221666_s_at | PYCARD     | PYD and CARD domain containing                                                                               | -1.247456 | -7.026632 | 2.19E-05 | 0.004068031 |
| 239843_at   | RIT1       | Ras-like without CAAX 1                                                                                      | 1.954359  | 7.025894  | 2.19E-05 | 0.004068031 |
| 200807_s_at | HSPD1      | heat shock 60kDa protein 1 (chaperonin)                                                                      | 1.102808  | 7.025672  | 2.19E-05 | 0.004068031 |
| 202241_at   | TRIB1      | tribbles homolog 1 (Drosophila)                                                                              | -0.451251 | -7.016629 | 2.22E-05 | 0.00408997  |
| 212296_at   | PSMD14     | proteasome (prosome, macropain) 26S subunit, non-ATPase, 14                                                  | 0.966333  | 7.016354  | 2.22E-05 | 0.00408997  |
| 222920_s_at | KIAA0748   | KIAA0748                                                                                                     | -0.634247 | -7.008294 | 2.25E-05 | 0.004116431 |
| 221087_s_at | APOL3      | apolipoprotein L, 3                                                                                          | -0.985511 | -7.006258 | 2.25E-05 | 0.004116431 |
| 223501_at   | TNFSF13B   | tumor necrosis factor (ligand) superfamily, member 13b                                                       | -1.501695 | -6.999498 | 2.27E-05 | 0.004139053 |
| 211855_s_at | SLC25A14   | solute carrier family 25 (mitochondrial carrier, brain), member 14                                           | -0.481349 | -6.995875 | 2.28E-05 | 0.004144855 |
| 203217_s_at | ST3GAL5    | ST3 beta-galactoside alpha-2,3-sialyltransferase 5                                                           | -1.466218 | -6.984999 | 2.31E-05 | 0.004190232 |
| 224956_at   | NUFIP2     | nuclear fragile X mental retardation protein interacting protein 2                                           | 1.136871  | 6.981962  | 2.32E-05 | 0.004193012 |
| 223502_s_at | TNFSF13B   | tumor necrosis factor (ligand) superfamily, member 13b                                                       | -1.599967 | -6.967974 | 2.37E-05 | 0.004256391 |
| 209606_at   | PSCDBP     | pleckstrin homology, Sec7 and coiled-coil domains, binding protein                                           | 1.426995  | 6.963186  | 2.38E-05 | 0.004269112 |
| 227274_at   | SYNJ2BP    | synaptojanin 2 binding protein                                                                               | -1.374936 | -6.956366 | 2.40E-05 | 0.004274407 |
| 204574_s_at | MMP19      | matrix metalloproteinase 19                                                                                  | -1.272350 | -6.956201 | 2.40E-05 | 0.004274407 |
| 231550_at   | XYLT2      | xylosyltransferase II                                                                                        | -0.777895 | -6.954768 | 2.41E-05 | 0.004274407 |
| 205011_at   | LOH11CR2A  | loss of heterozygosity, 11, chromosomal region 2, gene A                                                     | -1.192491 | -6.945579 | 2.44E-05 | 0.004310633 |
| 218230_at   | ARFIP1     | ADP-ribosylation factor interacting protein 1 (arfaptin 1)                                                   | -1.352180 | -6.943396 | 2.44E-05 | 0.004310633 |
| 212290_at   | SLC7A1     | solute carrier family 7 (cationic amino acid transporter, y+ system), member 1                               | 1.424611  | 6.939626  | 2.46E-05 | 0.004318079 |
| 202947_s_at | GYPC       | glycophorin C (Gerbich blood group)                                                                          | -0.426015 | -6.934513 | 2.47E-05 | 0.004322767 |

|             |          |                                                                                       |           |           |          |             |
|-------------|----------|---------------------------------------------------------------------------------------|-----------|-----------|----------|-------------|
| 234672_s_at | TMEM48   | transmembrane protein 48                                                              | -1.085275 | -6.933917 | 2.47E-05 | 0.004322767 |
| 223474_at   | C14orf4  | chromosome 14 open reading frame 4                                                    | -1.453790 | -6.931085 | 2.48E-05 | 0.004325056 |
| 202135_s_at | ACTR1B   | ARP1 actin-related protein 1 homolog B, contractin beta (yeast)                       | -0.787595 | -6.928562 | 2.49E-05 | 0.004325074 |
| 200958_s_at | SDCBP    | syndecan binding protein (syntenin)                                                   | 0.571267  | 6.926249  | 2.50E-05 | 0.004325074 |
| 203704_s_at | RREB1    | ras responsive element binding protein 1                                              | -1.184710 | -6.923556 | 2.51E-05 | 0.004326717 |
| 34210_at    | CD52     | CD52 antigen (CAMPATH-1 antigen)                                                      | -0.878644 | -6.914922 | 2.54E-05 | 0.00435747  |
| 201350_at   | FLOT2    | flotillin 2                                                                           | -0.789650 | -6.912220 | 2.55E-05 | 0.00435747  |
| 225763_at   | RCSD1    | RCSD domain containing 1                                                              | -1.623968 | -6.910052 | 2.55E-05 | 0.00435747  |
| 226681_at   | UBE2H    | ubiquitin-conjugating enzyme E2H (UBC8 homolog, yeast)                                | 1.163979  | 6.908639  | 2.56E-05 | 0.00435747  |
| 216438_s_at | TMSB4X   | thymosin, beta 4, X-linked                                                            | -1.049788 | -6.904286 | 2.57E-05 | 0.004368903 |
| 201847_at   | LIPA     | lipase A, lysosomal acid, cholesterol esterase (Wolman disease)                       | -1.119031 | -6.898254 | 2.59E-05 | 0.004377953 |
| 227346_at   | ZNFN1A1  | zinc finger protein, subfamily 1A, 1 (Ikaros)                                         | -2.212259 | -6.898014 | 2.59E-05 | 0.004377953 |
| 202470_s_at | CPSF6    | cleavage and polyadenylation specific factor 6, 68kDa                                 | 0.806190  | 6.894442  | 2.61E-05 | 0.004383584 |
| 222401_s_at | TMEM50A  | transmembrane protein 50A                                                             | 0.597654  | 6.886419  | 2.63E-05 | 0.004383584 |
| 219067_s_at | C10orf86 | chromosome 10 open reading frame 86                                                   | -1.082872 | -6.882678 | 2.65E-05 | 0.004383584 |
| 201542_at   | SAR1A    | SAR1 gene homolog A (S. cerevisiae)                                                   | 0.505249  | 6.881248  | 2.65E-05 | 0.004383584 |
| 212855_at   | DCUN1D4  | DCN1, defective in cullin neddylation 1, domain containing 4 (S. cerevisiae)          | 1.035061  | 6.880456  | 2.66E-05 | 0.004383584 |
| 200067_x_at | SNX3     | sorting nexin 3                                                                       | 0.649476  | 6.879537  | 2.66E-05 | 0.004383584 |
| 209014_at   | MAGED1   | melanoma antigen family D, 1                                                          | -0.646552 | -6.878349 | 2.66E-05 | 0.004383584 |
| 212330_at   | TFDP1    | transcription factor Dp-1                                                             | -0.647922 | -6.877829 | 2.66E-05 | 0.004383584 |
| 223361_at   | C6orf115 | chromosome 6 open reading frame 115                                                   | -0.844835 | -6.876268 | 2.67E-05 | 0.004383584 |
| 204923_at   | CXorf9   | chromosome X open reading frame 9                                                     | -1.591539 | -6.873808 | 2.68E-05 | 0.004384678 |
| 202152_x_at | USF2     | upstream transcription factor 2, c-fos interacting                                    | -0.582654 | -6.870387 | 2.69E-05 | 0.004390035 |
| 219212_at   | HSPA14   | heat shock 70kDa protein 14                                                           | 1.108532  | 6.868364  | 2.70E-05 | 0.004390035 |
| 209827_s_at | IL16     | interleukin 16 (lymphocyte chemoattractant factor)                                    | -0.799568 | -6.856865 | 2.74E-05 | 0.004430463 |
| 38241_at    | BTN3A3   | butyrophilin, subfamily 3, member A3                                                  | -2.042851 | -6.855503 | 2.74E-05 | 0.004430463 |
| 223711_s_at | THYN1    | thymocyte nuclear protein 1                                                           | -0.548122 | -6.854709 | 2.75E-05 | 0.004430463 |
| 201327_s_at | CCT6A    | chaperonin containing TCP1, subunit 6A (zeta 1)                                       | 0.913401  | 6.833106  | 2.83E-05 | 0.004545653 |
| 205128_x_at | PTGS1    | prostaglandin-endoperoxide synthase 1 (prostaglandin G/H synthase and cyclooxygenase) | -0.784750 | -6.828798 | 2.84E-05 | 0.004552196 |
| 223054_at   | DNAJB11  | DnaJ (Hsp40) homolog, subfamily B, member 11                                          | 1.005999  | 6.827599  | 2.85E-05 | 0.004552196 |
| 227106_at   | MMP19    | matrix metalloproteinase 19                                                           | -1.353400 | -6.821299 | 2.87E-05 | 0.004577025 |
| 228487_s_at | RREB1    | ras responsive element binding protein 1                                              | -1.234105 | -6.817527 | 2.89E-05 | 0.004586633 |
| 201051_at   | ANP32A   | acidic (leucine-rich) nuclear phosphoprotein 32 family, member A                      | -0.699746 | -6.803660 | 2.94E-05 | 0.004657305 |
| 200664_s_at | DNAJB1   | DnaJ (Hsp40) homolog, subfamily B, member 1                                           | 1.833486  | 6.801657  | 2.95E-05 | 0.004657305 |
| 200887_s_at | STAT1    | signal transducer and activator of transcription 1, 91kDa                             | -1.742542 | -6.795345 | 2.97E-05 | 0.004678481 |

|              |            |                                                                                     |           |           |          |             |
|--------------|------------|-------------------------------------------------------------------------------------|-----------|-----------|----------|-------------|
| 227139_s_at  | HPS3       | Hermansky-Pudlak syndrome 3                                                         | -1.634582 | -6.793914 | 2.98E-05 | 0.004678481 |
| 200633_at    | UBB        | ubiquitin B                                                                         | 0.902682  | 6.782502  | 3.02E-05 | 0.004736504 |
| 202690_s_at  | SNRPD1     | small nuclear ribonucleoprotein D1 polypeptide 16kDa                                | -0.493565 | -6.779013 | 3.04E-05 | 0.004744983 |
| 217845_x_at  | HIGD1A     | HIG1 domain family, member 1A                                                       | 0.842783  | 6.775726  | 3.05E-05 | 0.004752236 |
| 214259_s_at  | AKR7A2     | aldo-keto reductase family 7, member A2 (aflatoxin aldehyde reductase)              | -1.091207 | -6.773190 | 3.06E-05 | 0.004754489 |
| 208815_x_at  | HSPA4      | heat shock 70kDa protein 4                                                          | 0.850329  | 6.771110  | 3.07E-05 | 0.004754489 |
| 230805_at    |            |                                                                                     | -0.515093 | -6.765905 | 3.09E-05 | 0.00477409  |
| 201740_at    | NDUFS3     | NADH dehydrogenase (ubiquinone) Fe-S protein 3, 30kDa (NADH-coenzyme Q reductase)   | -0.765344 | -6.761300 | 3.11E-05 | 0.004789991 |
| 203778_at    | MANBA      | mannosidase, beta A, lysosomal                                                      | -1.293467 | -6.748312 | 3.16E-05 | 0.004855542 |
| 218149_s_at  | ZNF395     | zinc finger protein 395                                                             | -1.032774 | -6.746920 | 3.17E-05 | 0.004855542 |
| 204982_at    | GIT2       | G protein-coupled receptor kinase interactor 2                                      | -1.016720 | -6.739033 | 3.20E-05 | 0.004893323 |
| 209757_s_at  | MYCN       | v-myc myelocytomatosis viral related oncogene, neuroblastoma derived (avian)        | -3.315542 | -6.736302 | 3.22E-05 | 0.00489744  |
| 212718_at    | PAPOLA     | poly(A) polymerase alpha                                                            | 0.724728  | 6.732528  | 3.23E-05 | 0.00489744  |
| 201089_at    | ATP6V1B2   | ATPase, H+ transporting, lysosomal 56/58kDa, V1 subunit B2                          | 0.841048  | 6.732168  | 3.23E-05 | 0.00489744  |
| 219477_s_at  | THSD1      | thrombospondin, type I, domain containing 1                                         | -1.782578 | -6.727846 | 3.25E-05 | 0.004912259 |
| 208869_s_at  | GABARA PL1 | GABA(A) receptor-associated protein like 1                                          | 0.953593  | 6.725382  | 3.26E-05 | 0.004914922 |
| 222132_s_at  | MULK       | multiple substrate lipid kinase                                                     | -0.658432 | -6.722709 | 3.27E-05 | 0.004919    |
| 225775_at    | TSPAN33    | tetraspanin 33                                                                      | -0.553204 | -6.715601 | 3.31E-05 | 0.004941261 |
| 1568706_s_at | CTDSP2     | CTD (carboxy-terminal domain, RNA polymerase II, polypeptide A) small phosphatase 2 | -0.325181 | -6.715253 | 3.31E-05 | 0.004941261 |
| 218724_s_at  | TGIF2      | TGFB-induced factor 2 (TALE family homeobox)                                        | -0.761595 | -6.713182 | 3.32E-05 | 0.004941496 |
| 222825_at    | OTUD6B     | OTU domain containing 6B                                                            | 1.029650  | 6.708776  | 3.34E-05 | 0.004956206 |
| 200910_at    | CCT3       | chaperonin containing TCP1, subunit 3 (gamma)                                       | 1.157814  | 6.705123  | 3.35E-05 | 0.004956206 |
| 225048_at    | PHF10      | PHD finger protein 10                                                               | 1.192514  | 6.704899  | 3.35E-05 | 0.004956206 |
| 232926_x_at  | ANKRD19    | ankyrin repeat domain 19                                                            | -0.387219 | -6.701348 | 3.37E-05 | 0.004966466 |
| 205745_x_at  | ADAM17     | ADAM metallopeptidase domain 17 (tumor necrosis factor, alpha, converting enzyme)   | 1.038165  | 6.698687  | 3.38E-05 | 0.004970845 |
| 209377_s_at  | HMGN3      | high mobility group nucleosomal binding domain 3                                    | -0.873833 | -6.694263 | 3.40E-05 | 0.004976189 |
| 210688_s_at  | CPT1A      | carnitine palmitoyltransferase 1A (liver)                                           | -0.445747 | -6.693895 | 3.40E-05 | 0.004976189 |
| 222845_x_at  | TMBIM4     | transmembrane BAX inhibitor motif containing 4                                      | -0.635782 | -6.686804 | 3.44E-05 | 0.004998244 |
| 229711_s_at  | MGC5370    |                                                                                     | 0.334785  | 6.686126  | 3.44E-05 | 0.004998244 |
| 225698_at    | TIGA1      |                                                                                     | -1.371055 | -6.684662 | 3.45E-05 | 0.004998244 |
| 202252_at    | RAB13      | RAB13, member RAS oncogene family                                                   | -0.877102 | -6.677509 | 3.48E-05 | 0.005025208 |
| 223513_at    | CENPJ      | centromere protein J                                                                | 1.409436  | 6.676730  | 3.48E-05 | 0.005025208 |
| 211921_x_at  | PTMA       | prothymosin, alpha (gene sequence 28)                                               | -0.642513 | -6.666622 | 3.53E-05 | 0.005029483 |

|              |           |                                                                                     |           |           |          |             |
|--------------|-----------|-------------------------------------------------------------------------------------|-----------|-----------|----------|-------------|
| 227860_at    | CPXM      | carboxypeptidase X (M14 family)                                                     | -0.728240 | -6.665734 | 3.54E-05 | 0.005029483 |
| 201998_at    | ST6GAL1   | ST6 beta-galactosamide alpha-2,6-sialyltransferase 1                                | -1.326676 | -6.665635 | 3.54E-05 | 0.005029483 |
| 213521_at    | PTPN18    | protein tyrosine phosphatase, non-receptor type 18 (brain-derived)                  | -0.432407 | -6.665107 | 3.54E-05 | 0.005029483 |
| 212632_at    | STX7      | syntaxin 7                                                                          | -0.723204 | -6.664842 | 3.54E-05 | 0.005029483 |
| 242984_at    | MKLN1     | muskelin 1, intracellular mediator containing kelch motifs                          | 0.429875  | 6.664434  | 3.54E-05 | 0.005029483 |
| 205668_at    | LY75      | lymphocyte antigen 75                                                               | -1.671470 | -6.662381 | 3.55E-05 | 0.005030347 |
| 229509_at    | MGC33302  |                                                                                     | -0.783779 | -6.652337 | 3.60E-05 | 0.005074627 |
| 202000_at    | NDUFA6    | NADH dehydrogenase (ubiquinone) 1 alpha subcomplex, 6, 14kDa                        | 0.812612  | 6.650170  | 3.61E-05 | 0.005074627 |
| 208012_x_at  | SP110     | SP110 nuclear body protein                                                          | -1.416582 | -6.649509 | 3.61E-05 | 0.005074627 |
| 202155_s_at  | NUP214    | nucleoporin 214kDa                                                                  | -0.797649 | -6.648238 | 3.62E-05 | 0.005074627 |
| 225005_at    | PHF13     | PHD finger protein 13                                                               | 1.375230  | 6.644599  | 3.64E-05 | 0.00508424  |
| 209020_at    | C20orf111 | chromosome 20 open reading frame 111                                                | 1.275419  | 6.643046  | 3.65E-05 | 0.00508424  |
| 1555812_a_at | ARHGDIB   | Rho GDP dissociation inhibitor (GDI) beta                                           | -1.471154 | -6.641139 | 3.65E-05 | 0.005084379 |
| 223305_at    | MGC13379  |                                                                                     | -0.891944 | -6.631158 | 3.70E-05 | 0.005140327 |
| 234573_at    | FLJ20859  |                                                                                     | -0.797002 | -6.627360 | 3.72E-05 | 0.005153711 |
| 204820_s_at  | BTN3A3    | butyrophilin, subfamily 3, member A3                                                | -2.006064 | -6.625151 | 3.73E-05 | 0.005156074 |
| 219439_at    | C1GALT1   | core 1 synthase, glycoprotein-N-acetylgalactosamine 3-beta-galactosyltransferase, 1 | 0.827108  | 6.622292  | 3.75E-05 | 0.005163017 |
| 208898_at    | ATP6V1D   | ATPase, H <sup>+</sup> transporting, lysosomal 34kDa, V1 subunit D                  | 1.075987  | 6.613989  | 3.79E-05 | 0.005208245 |
| 1555197_a_at | C21orf58  | chromosome 21 open reading frame 58                                                 | -0.346012 | -6.605758 | 3.83E-05 | 0.005253428 |
| 214801_at    | TOR1AIP2  | torsin A interacting protein 2                                                      | 0.720121  | 6.599699  | 3.87E-05 | 0.005283508 |
| 225546_at    | EEF2K     | eukaryotic elongation factor-2 kinase                                               | -1.645226 | -6.594200 | 3.89E-05 | 0.005309782 |
| 201636_at    | FXR1      | fragile X mental retardation, autosomal homolog 1                                   | 0.944566  | 6.587819  | 3.93E-05 | 0.005333786 |
| 1557910_at   | HSP90AB1  | heat shock protein 90kDa alpha (cytosolic), class B member 1                        | 1.032795  | 6.587210  | 3.93E-05 | 0.005333786 |
| 231747_at    | CYSLTR1   | cysteinyl leukotriene receptor 1                                                    | -1.215325 | -6.579038 | 3.98E-05 | 0.005379951 |
| 226915_s_at  | ARPC5L    | actin related protein 2/3 complex, subunit 5-like                                   | 0.587700  | 6.576882  | 3.99E-05 | 0.005382409 |
| 222978_at    | SURF4     | surfeit 4                                                                           | 0.979697  | 6.572694  | 4.01E-05 | 0.005388871 |
| 223583_at    | TNFAIP8L2 | tumor necrosis factor, alpha-induced protein 8-like 2                               | -1.155868 | -6.572375 | 4.01E-05 | 0.005388871 |
| 219433_at    | BCOR      | BCL6 co-repressor                                                                   | -1.889790 | -6.570475 | 4.02E-05 | 0.005389566 |
| 229582_at    | C18orf37  | chromosome 18 open reading frame 37                                                 | -0.821539 | -6.567502 | 4.04E-05 | 0.005398165 |
| 205801_s_at  | RASGRP3   | RAS guanyl releasing protein 3 (calcium and DAG-regulated)                          | -1.199523 | -6.561159 | 4.07E-05 | 0.00541242  |
| 202257_s_at  | CD2BP2    | CD2 antigen (cytoplasmic tail) binding protein 2                                    | -0.592539 | -6.558142 | 4.09E-05 | 0.00541242  |
| 203893_at    | TAF9      | TAF9 RNA polymerase II, TATA box binding protein (TBP)-associated factor, 32kDa     | 0.971934  | 6.557710  | 4.09E-05 | 0.00541242  |

|             |          |                                                                                          |           |           |          |             |
|-------------|----------|------------------------------------------------------------------------------------------|-----------|-----------|----------|-------------|
| 214280_x_at | HNRPA1   | heterogeneous nuclear ribonucleoprotein A1                                               | -0.724324 | -6.556578 | 4.10E-05 | 0.00541242  |
| 221896_s_at | HIGD1A   | HIG1 domain family, member 1A                                                            | 0.762686  | 6.555724  | 4.10E-05 | 0.00541242  |
| 213395_at   | MLC1     | megalencephalic leukoencephalopathy with subcortical cysts 1                             | -0.545233 | -6.554862 | 4.11E-05 | 0.00541242  |
| 224480_s_at | HMFN0839 |                                                                                          | 1.740486  | 6.543403  | 4.17E-05 | 0.005476119 |
| 213657_s_at | ZNF710   | zinc finger protein 710                                                                  | -1.060732 | -6.542745 | 4.18E-05 | 0.005476119 |
| 218023_s_at | FAM53C   | family with sequence similarity 53, member C                                             | 0.972711  | 6.539497  | 4.20E-05 | 0.005487266 |
| 225347_at   | ARL8A    | ADP-ribosylation factor-like 8A                                                          | 0.258189  | 6.531729  | 4.24E-05 | 0.005532487 |
| 222459_at   | C1orf108 | chromosome 1 open reading frame 108                                                      | 0.678800  | 6.524228  | 4.28E-05 | 0.00556326  |
| 205504_at   | BTK      | Bruton agammaglobulinemia tyrosine kinase                                                | -0.939381 | -6.523019 | 4.29E-05 | 0.00556326  |
| 230621_at   | ADAM17   | ADAM metalloproteinase domain 17 (tumor necrosis factor, alpha, converting enzyme)       | 1.090312  | 6.522440  | 4.29E-05 | 0.00556326  |
| 202231_at   | hfl-B5   |                                                                                          | -0.536849 | -6.517290 | 4.32E-05 | 0.005580306 |
| 201807_at   | VPS26A   | vacuolar protein sorting 26 homolog A (yeast)                                            | 0.885802  | 6.516741  | 4.33E-05 | 0.005580306 |
| 209674_at   | CRY1     | cryptochrome 1 (photolyase-like)                                                         | 1.153076  | 6.511922  | 4.36E-05 | 0.005603962 |
| 220195_at   | MBD5     | methyl-CpG binding domain protein 5                                                      | 0.561617  | 6.507164  | 4.38E-05 | 0.005627307 |
| 207666_x_at | SSX3     | synovial sarcoma, X breakpoint 3                                                         | 0.364665  | 6.504971  | 4.40E-05 | 0.005630998 |
| 240698_s_at | EXOSC2   | exosome component 2                                                                      | -0.639406 | -6.503043 | 4.41E-05 | 0.005632682 |
| 212954_at   | DYRK4    | dual-specificity tyrosine-(Y)-phosphorylation regulated kinase 4                         | -0.576702 | -6.500591 | 4.42E-05 | 0.005638441 |
| 226910_at   | COMMD2   | COMM domain containing 2                                                                 | -1.360461 | -6.498545 | 4.44E-05 | 0.005641108 |
| 204868_at   | ICT1     | immature colon carcinoma transcript 1                                                    | -0.558677 | -6.487967 | 4.50E-05 | 0.005702671 |
| 221481_x_at | HNRPD    | heterogeneous nuclear ribonucleoprotein D (AU-rich element RNA binding protein 1, 37kDa) | -0.384229 | -6.485910 | 4.51E-05 | 0.005702671 |
| 204000_at   | GNB5     | guanine nucleotide binding protein (G protein), beta 5                                   | -0.771054 | -6.484868 | 4.52E-05 | 0.005702671 |
| 203672_x_at | TPMT     | thiopurine S-methyltransferase                                                           | 0.508375  | 6.481656  | 4.54E-05 | 0.005702671 |
| 200053_at   | SPAG7    | sperm associated antigen 7                                                               | -0.397820 | -6.481039 | 4.54E-05 | 0.005702671 |
| 202194_at   | TMED5    | transmembrane emp24 protein transport domain containing 5                                | 1.550687  | 6.479253  | 4.56E-05 | 0.005702671 |
| 203765_at   | GCA      | grancalcin, EF-hand calcium binding protein                                              | -0.951568 | -6.478546 | 4.56E-05 | 0.005702671 |
| 204970_s_at | MAFG     | v-maf musculoaponeurotic fibrosarcoma oncogene homolog G (avian)                         | 1.024342  | 6.477173  | 4.57E-05 | 0.005702671 |
| 227221_at   |          |                                                                                          | -1.534597 | -6.470790 | 4.61E-05 | 0.005731476 |
| 203206_at   | FAM53B   | family with sequence similarity 53, member B                                             | -0.508288 | -6.469191 | 4.62E-05 | 0.005731476 |
| 212124_at   | RAI17    | retinoic acid induced 17                                                                 | -1.576015 | -6.468528 | 4.62E-05 | 0.005731476 |
| 203556_at   | ZHX2     | zinc fingers and homeoboxes 2                                                            | -1.405345 | -6.465551 | 4.64E-05 | 0.005738454 |
| 223777_at   | MGC13005 |                                                                                          | -0.289588 | -6.464347 | 4.65E-05 | 0.005738454 |
| 224516_s_at | CXXC5    | CXXC finger 5                                                                            | -1.674005 | -6.462006 | 4.66E-05 | 0.005743964 |
| 220560_at   | C11orf21 | chromosome 11 open reading frame 21                                                      | -1.002930 | -6.459988 | 4.68E-05 | 0.005746974 |

|             |            |                                                                                                       |           |           |          |             |
|-------------|------------|-------------------------------------------------------------------------------------------------------|-----------|-----------|----------|-------------|
| 208056_s_at | CBFA2T3    | core-binding factor, runt domain, alpha subunit 2, translocated to, 3                                 | -1.219252 | -6.452173 | 4.73E-05 | 0.005796014 |
| 240862_at   | RASGRP4    | RAS guanyl releasing protein 4                                                                        | -1.237935 | -6.437821 | 4.82E-05 | 0.005898393 |
| 221691_x_at | NPM1       | nucleophosmin (nucleolar phosphoprotein B23, numatrin)                                                | -0.344136 | -6.433700 | 4.85E-05 | 0.005918728 |
| 203509_at   | SORL1      | sortilin-related receptor, L(DLR class) A repeats-containing                                          | -1.623409 | -6.428094 | 4.89E-05 | 0.005951338 |
| 224601_at   |            |                                                                                                       | -0.851168 | -6.426398 | 4.90E-05 | 0.005952013 |
| 222979_s_at | SURF4      | surfeit 4                                                                                             | 1.029007  | 6.423809  | 4.92E-05 | 0.005960048 |
| 203186_s_at | S100A4     | S100 calcium binding protein A4 (calcium protein, calvasculin, metastasin, murine placental homolog)  | -1.323882 | -6.421395 | 4.93E-05 | 0.005966418 |
| 213475_s_at | ITGAL      | integrin, alpha L (antigen CD11A (p180), lymphocyte function-associated antigen 1, alpha polypeptide) | -1.300590 | -6.419487 | 4.95E-05 | 0.005966418 |
| 205212_s_at | CENTB1     | centaurin, beta 1                                                                                     | -0.894313 | -6.418228 | 4.95E-05 | 0.005966418 |
| 231188_at   | ZSCAN2     | zinc finger and SCAN domain containing 2                                                              | -0.774231 | -6.415439 | 4.97E-05 | 0.00596812  |
| 211458_s_at | GABARA PL3 | GABA(A) receptors associated protein like 3                                                           | 1.862089  | 6.414522  | 4.98E-05 | 0.00596812  |
| 230866_at   | CYSLTR1    | cysteinyl leukotriene receptor 1                                                                      | -1.350440 | -6.413248 | 4.99E-05 | 0.00596812  |
| 225220_at   |            |                                                                                                       | -0.953065 | -6.398992 | 5.09E-05 | 0.00607351  |
| 209099_x_at | JAG1       | jagged 1 (Alagille syndrome)                                                                          | -1.337329 | -6.394048 | 5.12E-05 | 0.006100825 |
| 235196_at   | CDC73      | cell division cycle 73, Paf1/RNA polymerase II complex component, homolog (S. cerevisiae)             | 1.155951  | 6.392595  | 5.13E-05 | 0.006100825 |
| 226128_at   | C1orf58    | chromosome 1 open reading frame 58                                                                    | 0.521008  | 6.387211  | 5.17E-05 | 0.006110669 |
| 227344_at   | ZNFN1A1    | zinc finger protein, subfamily 1A, 1 (Ikaros)                                                         | -1.922053 | -6.386009 | 5.18E-05 | 0.006110669 |
| 213911_s_at | H2AFZ      | H2A histone family, member Z                                                                          | 0.626476  | 6.384928  | 5.19E-05 | 0.006110669 |
| 223892_s_at | TMBIM4     | transmembrane BAX inhibitor motif containing 4                                                        | -0.606997 | -6.384558 | 5.19E-05 | 0.006110669 |
| 200713_s_at | MAPRE1     | microtubule-associated protein, RP/EB family, member 1                                                | 0.560262  | 6.383616  | 5.20E-05 | 0.006110669 |
| 229766_at   | ZNF445     | zinc finger protein 445                                                                               | -0.672636 | -6.378912 | 5.23E-05 | 0.006137398 |
| 223773_s_at | C1orf79    | chromosome 1 open reading frame 79                                                                    | -0.601405 | -6.369126 | 5.30E-05 | 0.006207853 |
| 220104_at   | ZC3HAV1    | zinc finger CCCH-type, antiviral 1                                                                    | 0.587204  | 6.365868  | 5.33E-05 | 0.006218792 |
| 221249_s_at | LOC81558   |                                                                                                       | -1.285156 | -6.364774 | 5.33E-05 | 0.006218792 |
| 242007_at   |            |                                                                                                       | 1.192668  | 6.360332  | 5.37E-05 | 0.006243916 |
| 225157_at   | MLXIP      | MLX interacting protein                                                                               | -1.145211 | -6.358526 | 5.38E-05 | 0.006246284 |
| 226802_s_at | LOC96610   |                                                                                                       | 1.121695  | 6.353496  | 5.42E-05 | 0.006276716 |
| 200733_s_at | PTP4A1     | protein tyrosine phosphatase type IVA, member 1                                                       | 0.497319  | 6.350295  | 5.44E-05 | 0.006288314 |
| 227413_at   | UBLCP1     | ubiquitin-like domain containing CTD phosphatase 1                                                    | -0.662918 | -6.349122 | 5.45E-05 | 0.006288314 |
| 243927_x_at | KIAA1429   | KIAA1429                                                                                              | 0.450590  | 6.345495  | 5.48E-05 | 0.006304875 |
| 220885_s_at | CENPJ      | centromere protein J                                                                                  | 0.997102  | 6.344197  | 5.49E-05 | 0.006304875 |
| 217257_at   | STMN1      | stathmin 1/oncoprotein 18                                                                             | -1.434986 | -6.331098 | 5.59E-05 | 0.006404877 |
| 225646_at   | CTSC       | cathepsin C                                                                                           | -1.126399 | -6.329863 | 5.60E-05 | 0.006404877 |
| 90610_at    | LRCH4      | leucine-rich repeats and calponin homology (CH) domain containing 4                                   | -0.499164 | -6.323786 | 5.65E-05 | 0.006445794 |

|              |            |                                                                                                      |           |           |          |             |
|--------------|------------|------------------------------------------------------------------------------------------------------|-----------|-----------|----------|-------------|
| 208778_s_at  | TCP1       | t-complex 1                                                                                          | 1.012490  | 6.321097  | 5.67E-05 | 0.006456497 |
| 210044_s_at  | LYL1       | lymphoblastic leukemia derived sequence 1                                                            | -0.529732 | -6.316932 | 5.70E-05 | 0.006480554 |
| 212441_at    | KIAA0232   |                                                                                                      | 1.148296  | 6.308593  | 5.77E-05 | 0.006537284 |
| 219183_s_at  | PSCD4      | pleckstrin homology, Sec7 and coiled-coil domains 4                                                  | -0.923042 | -6.307701 | 5.78E-05 | 0.006537284 |
| 235463_s_at  | LASS6      | LAG1 longevity assurance homolog 6 ( <i>S. cerevisiae</i> )                                          | 0.865934  | 6.301522  | 5.83E-05 | 0.006580245 |
| 226641_at    | ANKRD44    | ankyrin repeat domain 44                                                                             | -1.243788 | -6.299019 | 5.85E-05 | 0.006589652 |
| 201463_s_at  | TALDO1     | transaldolase 1                                                                                      | 0.725643  | 6.291640  | 5.91E-05 | 0.006644184 |
| 201263_at    | TARS       | threonyl-tRNA synthetase                                                                             | 0.761031  | 6.288664  | 5.93E-05 | 0.00665761  |
| 208975_s_at  | KPNB1      | karyopherin (importin) beta 1                                                                        | 0.544238  | 6.287255  | 5.94E-05 | 0.00665761  |
| 204972_at    | OAS2       | 2'-5'-oligoadenylate synthetase 2, 69/71kDa                                                          | -2.143239 | -6.284992 | 5.96E-05 | 0.006665029 |
| 200953_s_at  | CCND2      | cyclin D2                                                                                            | -0.587250 | -6.280929 | 5.99E-05 | 0.006677256 |
| 1555500_s_at | SLC2A4R G  | SLC2A4 regulator                                                                                     | -1.590086 | -6.279743 | 6.00E-05 | 0.006677256 |
| 219681_s_at  | RAB11FIP 1 | RAB11 family interacting protein 1 (class I)                                                         | -1.184671 | -6.279305 | 6.01E-05 | 0.006677256 |
| 224919_at    | MRPS6      | mitochondrial ribosomal protein S6                                                                   | 1.048378  | 6.272740  | 6.06E-05 | 0.006713206 |
| 227677_at    | JAK3       | Janus kinase 3 (a protein tyrosine kinase, leukocyte)                                                | -1.209909 | -6.272565 | 6.07E-05 | 0.006713206 |
| 223227_at    | BBS2       | Bardet-Biedl syndrome 2                                                                              | -1.180790 | -6.267564 | 6.11E-05 | 0.006746695 |
| 211487_x_at  | RPS17      | ribosomal protein S17                                                                                | -0.439568 | -6.264776 | 6.13E-05 | 0.006759427 |
| 227556_at    | ATP1B1     | ATPase, Na <sup>+</sup> /K <sup>+</sup> transporting, beta 1 polypeptide                             | -0.941999 | -6.255598 | 6.21E-05 | 0.006833106 |
| 212377_s_at  | NOTCH2     | Notch homolog 2 ( <i>Drosophila</i> )                                                                | -0.778926 | -6.252757 | 6.24E-05 | 0.006842527 |
| 222804_x_at  | WDR32      | WD repeat domain 32                                                                                  | 0.652424  | 6.251750  | 6.24E-05 | 0.006842527 |
| 215629_s_at  | KIAA1799   |                                                                                                      | 1.135504  | 6.248275  | 6.28E-05 | 0.006862194 |
| 200068_s_at  | CANX       | calnexin                                                                                             | 0.318622  | 6.244498  | 6.31E-05 | 0.00687311  |
| 226840_at    | H2AFY      | H2A histone family, member Y                                                                         | -0.985105 | -6.244295 | 6.31E-05 | 0.00687311  |
| 201761_at    | MTHFD2     | methylenetetrahydrofolate dehydrogenase (NADP+ dependent) 2, methenyltetrahydrofolate cyclohydrolase | 1.125780  | 6.238435  | 6.36E-05 | 0.006909789 |
| 212039_x_at  | RPL3       | ribosomal protein L3                                                                                 | -0.336774 | -6.236363 | 6.38E-05 | 0.006909789 |
| 208692_at    | RPS3       | ribosomal protein S3                                                                                 | -0.372280 | -6.236257 | 6.38E-05 | 0.006909789 |
| 218962_s_at  | FLJ13576   |                                                                                                      | -1.247370 | -6.234499 | 6.40E-05 | 0.006913176 |
| 206687_s_at  | PTPN6      | protein tyrosine phosphatase, non-receptor type 6                                                    | -1.205595 | -6.232471 | 6.42E-05 | 0.006919221 |
| 226219_at    | ARHGAP3 0  | Rho GTPase activating protein 30                                                                     | -1.589523 | -6.225059 | 6.48E-05 | 0.006976042 |
| 238498_at    |            |                                                                                                      | -0.306275 | -6.223372 | 6.50E-05 | 0.006976042 |
| 1557487_at   | SIDT1      | SID1 transmembrane family, member 1                                                                  | 0.334776  | 6.222451  | 6.51E-05 | 0.006976042 |
| 214316_x_at  | CALR       | calreticulin                                                                                         | 0.262479  | 6.216936  | 6.56E-05 | 0.007004388 |
| 1555851_s_at | SEPW1      | selenoprotein W, 1                                                                                   | 1.146999  | 6.215127  | 6.57E-05 | 0.007004388 |
| 202110_at    | COX7B      | cytochrome c oxidase subunit VIIb                                                                    | 0.464661  | 6.214838  | 6.58E-05 | 0.007004388 |
| 203723_at    | ITPKB      | inositol 1,4,5-trisphosphate 3-kinase B                                                              | -1.815186 | -6.209903 | 6.62E-05 | 0.007004388 |
| 212235_at    | PLXND1     | plexin D1                                                                                            | -0.804563 | -6.209699 | 6.62E-05 | 0.007004388 |
| 242317_at    |            |                                                                                                      | 1.489433  | 6.209239  | 6.63E-05 | 0.007004388 |
| 235441_at    | ADCY3      | adenylate cyclase 3                                                                                  | -0.377895 | -6.206261 | 6.66E-05 | 0.007004388 |
| 207992_s_at  | AMPD3      | adenosine monophosphate deaminase (isoform E)                                                        | -1.234327 | -6.205973 | 6.66E-05 | 0.007004388 |
| 211069_s_at  | SUMO1      | SMT3 suppressor of mif two 3 homolog 1 (yeast)                                                       | 0.467819  | 6.205502  | 6.66E-05 | 0.007004388 |
| 225530_at    | MOBKL2A    | MOB1, Mps One Binder kinase activator-like 2A (yeast)                                                | -1.081353 | -6.204023 | 6.68E-05 | 0.007004388 |

|             |                 |                                                                                                                    |           |           |          |             |
|-------------|-----------------|--------------------------------------------------------------------------------------------------------------------|-----------|-----------|----------|-------------|
| 207559_s_at | ZMYM3           | zinc finger, MYM-type 3                                                                                            | -1.125374 | -6.203925 | 6.68E-05 | 0.007004388 |
| 218248_at   | FAM111A         | family with sequence similarity 111, member A                                                                      | -1.183026 | -6.202166 | 6.70E-05 | 0.007004388 |
| 216870_x_at | DLEU2           | deleted in lymphocytic leukemia, 2                                                                                 | 1.072673  | 6.200702  | 6.71E-05 | 0.007004388 |
| 201315_x_at | IFITM2          | interferon induced transmembrane protein 2 (1-8D)                                                                  | -1.202019 | -6.200327 | 6.71E-05 | 0.007004388 |
| 233055_at   |                 |                                                                                                                    | 0.268920  | 6.194315  | 6.77E-05 | 0.007050523 |
| 202330_s_at | UNG             | uracil-DNA glycosylase                                                                                             | -0.476980 | -6.191850 | 6.79E-05 | 0.00705094  |
| 203236_s_at | LGALS9          | lectin, galactoside-binding, soluble, 9 (galectin 9)                                                               | -0.608746 | -6.190658 | 6.81E-05 | 0.00705094  |
| 223469_at   | MGC10812        |                                                                                                                    | -0.916977 | -6.189234 | 6.82E-05 | 0.00705094  |
| 230235_at   | C1GALT1C1       | C1GALT1-specific chaperone 1                                                                                       | -0.665945 | -6.188890 | 6.82E-05 | 0.00705094  |
| 201300_s_at | PRNP            | prion protein (p27-30) (Creutzfeld-Jakob disease, Gerstmann-Strausler-Scheinker syndrome, fatal familial insomnia) | 1.829351  | 6.183952  | 6.87E-05 | 0.007073771 |
| 204072_s_at | FRY             | furry homolog (Drosophila)                                                                                         | -1.216021 | -6.183923 | 6.87E-05 | 0.007073771 |
| 218871_x_at | GALNACT-2       |                                                                                                                    | 1.002762  | 6.182222  | 6.89E-05 | 0.00707744  |
| 225692_at   | CAMTA1          | calmodulin binding transcription activator 1                                                                       | 1.166092  | 6.178989  | 6.92E-05 | 0.007096471 |
| 226765_at   | SPTBN1          | spectrin, beta, non-erythrocytic 1                                                                                 | -1.226054 | -6.176664 | 6.94E-05 | 0.007100054 |
| 36030_at    | HOM-<br>TES-103 |                                                                                                                    | -0.866341 | -6.175979 | 6.95E-05 | 0.007100054 |
| 221476_s_at | RPL15           | ribosomal protein L15                                                                                              | -0.630313 | -6.173024 | 6.98E-05 | 0.007116439 |
| 218951_s_at | PLCXD1          | phosphatidylinositol-specific phospholipase C, X domain containing 1                                               | -1.237092 | -6.168216 | 7.02E-05 | 0.007151601 |
| 202521_at   | CTCF            | CCCTC-binding factor (zinc finger protein)                                                                         | -0.903761 | -6.164980 | 7.06E-05 | 0.007169053 |
| 222420_s_at | UBE2H           | ubiquitin-conjugating enzyme E2H (UBC8 homolog, yeast)                                                             | 1.245717  | 6.162835  | 7.08E-05 | 0.007169053 |
| 210502_s_at | PPIE            | peptidylprolyl isomerase E (cyclophilin E)                                                                         | -0.507403 | -6.162551 | 7.08E-05 | 0.007169053 |
| 239134_at   | POLR3C          | polymerase (RNA) III (DNA directed) polypeptide C (62kD)                                                           | 1.126755  | 6.158372  | 7.12E-05 | 0.007190875 |
| 228990_at   | C1orf79         | chromosome 1 open reading frame 79                                                                                 | -0.715689 | -6.157788 | 7.13E-05 | 0.007190875 |
| 205039_s_at | ZNFN1A1         | zinc finger protein, subfamily 1A, 1 (Ikaros)                                                                      | -1.832657 | -6.155802 | 7.15E-05 | 0.007196233 |
| 218089_at   | C20orf4         | chromosome 20 open reading frame 4                                                                                 | -0.458675 | -6.154658 | 7.16E-05 | 0.007196233 |
| 224572_s_at | IRF2BP2         | interferon regulatory factor 2 binding protein 2                                                                   | -0.891680 | -6.151186 | 7.20E-05 | 0.007218405 |
| 241955_at   | HECTD1          | HECT domain containing 1                                                                                           | 0.381094  | 6.146459  | 7.24E-05 | 0.007253568 |
| 203117_s_at | USP52           | ubiquitin specific peptidase 52                                                                                    | -0.597455 | -6.143269 | 7.28E-05 | 0.007273095 |
| 234153_at   | SYNJ2           | synaptojanin 2                                                                                                     | 0.427706  | 6.136206  | 7.35E-05 | 0.007332847 |
| 211714_x_at | TUBB            | tubulin, beta                                                                                                      | -1.089814 | -6.132664 | 7.39E-05 | 0.007356337 |
| 201324_at   | EMP1            | epithelial membrane protein 1                                                                                      | 0.649192  | 6.125288  | 7.46E-05 | 0.007420188 |
| 226238_at   | MCEE            | methylmalonyl CoA epimerase                                                                                        | -0.737285 | -6.122160 | 7.50E-05 | 0.007437824 |
| 224565_at   | TncRNA          |                                                                                                                    | 0.872043  | 6.121058  | 7.51E-05 | 0.007437824 |
| 227395_at   | LRRC35          | leucine rich repeat containing 35                                                                                  | -0.905226 | -6.119190 | 7.53E-05 | 0.007444092 |
| 207698_at   | C6orf123        | chromosome 6 open reading frame 123                                                                                | 0.249014  | 6.114014  | 7.58E-05 | 0.007485472 |
| 213348_at   | CDKN1C          | cyclin-dependent kinase inhibitor 1C (p57, Kip2)                                                                   | -1.477921 | -6.112621 | 7.60E-05 | 0.007486782 |
| 201184_s_at | CHD4            | chromodomain helicase DNA binding protein 4                                                                        | -0.515154 | -6.103475 | 7.70E-05 | 0.007571108 |



|                            |             |                                                                                            |           |           |          |             |
|----------------------------|-------------|--------------------------------------------------------------------------------------------|-----------|-----------|----------|-------------|
| 215091_s_at                | GTF3A       | general transcription factor IIIA                                                          | -1.195689 | -6.098380 | 7.76E-05 | 0.007592035 |
| 229543_at                  | RP1-93H18.5 |                                                                                            | -1.506450 | -6.097771 | 7.76E-05 | 0.007592035 |
| 228264_at                  | PHACS       |                                                                                            | -0.594415 | -6.097751 | 7.76E-05 | 0.007592035 |
| 229391_s_at                | RP1-93H18.5 |                                                                                            | -1.395080 | -6.094586 | 7.80E-05 | 0.007596755 |
| 205147_x_at                | NCF4        | neutrophil cytosolic factor 4, 40kDa                                                       | -0.776661 | -6.093367 | 7.81E-05 | 0.007596755 |
| 217907_at                  | MRPL18      | mitochondrial ribosomal protein L18                                                        | 1.038389  | 6.091260  | 7.83E-05 | 0.007596755 |
| AFFX-HUMISGF3A/M97935_3_at | STAT1       | signal transducer and activator of transcription 1, 91kDa                                  | -1.921265 | -6.091075 | 7.84E-05 | 0.007596755 |
| 39402_at                   | IL1B        | interleukin 1, beta                                                                        | -1.115979 | -6.090060 | 7.85E-05 | 0.007596755 |
| 229733_s_at                | CBX6        | chromobox homolog 6                                                                        | -0.733497 | -6.089813 | 7.85E-05 | 0.007596755 |
| 219966_x_at                | BANP        | BTG3 associated nuclear protein                                                            | 1.005064  | 6.085236  | 7.90E-05 | 0.007632918 |
| 211941_s_at                | PEBP1       | phosphatidylethanolamine binding protein 1                                                 | -0.561214 | -6.073780 | 8.03E-05 | 0.00773365  |
| 206019_at                  | RBM19       | RNA binding motif protein 19                                                               | -0.520792 | -6.073562 | 8.03E-05 | 0.00773365  |
| 208899_x_at                | ATP6V1D     | ATPase, H+ transporting, lysosomal 34kDa, V1 subunit D                                     | 0.805160  | 6.069121  | 8.09E-05 | 0.007769113 |
| 64488_at                   |             |                                                                                            | 0.913146  | 6.063928  | 8.15E-05 | 0.0077897   |
| 220346_at                  | MTHFD2L     | methylenetetrahydrofolate dehydrogenase (NADP+ dependent) 2-like                           | 1.678590  | 6.062151  | 8.17E-05 | 0.0077897   |
| 201524_x_at                | UBE2N       | ubiquitin-conjugating enzyme E2N (UBC13 homolog, yeast)                                    | 0.356250  | 6.061826  | 8.17E-05 | 0.0077897   |
| 235829_at                  |             |                                                                                            | 0.699651  | 6.061568  | 8.17E-05 | 0.0077897   |
| 38149_at                   | ARHGAP25    | Rho GTPase activating protein 25                                                           | -1.121835 | -6.061028 | 8.18E-05 | 0.0077897   |
| 209762_x_at                | SP110       | SP110 nuclear body protein                                                                 | -1.186518 | -6.059918 | 8.19E-05 | 0.0077897   |
| 208646_at                  | RPS14       | ribosomal protein S14                                                                      | -0.493959 | -6.055823 | 8.24E-05 | 0.007809729 |
| 204252_at                  | CDK2        | cyclin-dependent kinase 2                                                                  | 0.583133  | 6.054916  | 8.25E-05 | 0.007809729 |
| 205300_s_at                | U1SNRNPBP   |                                                                                            | -0.651605 | -6.054476 | 8.26E-05 | 0.007809729 |
| 201012_at                  | ANXA1       | annexin A1                                                                                 | 1.070613  | 6.052093  | 8.28E-05 | 0.007822833 |
| 219401_at                  | XYLT2       | xylosyltransferase II                                                                      | -0.838432 | -6.049794 | 8.31E-05 | 0.007835051 |
| 201346_at                  | ADIPOR2     | adiponectin receptor 2                                                                     | 0.583444  | 6.039594  | 8.43E-05 | 0.007936479 |
| 227266_s_at                | FYB         | FYN binding protein (FYB-120/130)                                                          | -1.841954 | -6.036675 | 8.47E-05 | 0.007956003 |
| 202969_at                  | DYRK2       | dual-specificity tyrosine-(Y)-phosphorylation regulated kinase 2                           | -1.249373 | -6.033344 | 8.51E-05 | 0.007973257 |
| 232300_at                  | C10orf116   | chromosome 10 open reading frame 116                                                       | 0.358996  | 6.032101  | 8.52E-05 | 0.007973257 |
| 200924_s_at                | SLC3A2      | solute carrier family 3 (activators of dibasic and neutral amino acid transport), member 2 | 0.776312  | 6.031570  | 8.53E-05 | 0.007973257 |
| 223329_x_at                | SUGT1       | SGT1, suppressor of G2 allele of SKP1 (S. cerevisiae)                                      | 1.491876  | 6.029295  | 8.56E-05 | 0.007985628 |
| 1553708_at                 | MGC16075    |                                                                                            | 0.252717  | 6.022806  | 8.64E-05 | 0.008046469 |
| 217913_at                  | VPS4A       | vacuolar protein sorting 4A (yeast)                                                        | 0.603416  | 6.019808  | 8.68E-05 | 0.00806737  |
| 201829_at                  | NET1        | neuroepithelial cell transforming gene 1                                                   | -0.871659 | -6.013514 | 8.75E-05 | 0.008116869 |
| 231932_at                  | TRAF3IP3    | TRAF3 interacting protein 3                                                                | -0.993894 | -6.012566 | 8.77E-05 | 0.008116869 |
| 201118_at                  | PGD         | phosphogluconate dehydrogenase                                                             | 1.390597  | 6.011993  | 8.77E-05 | 0.008116869 |
| 216199_s_at                | MAP3K4      | mitogen-activated protein kinase kinase kinase 4                                           | -0.360580 | -6.006472 | 8.84E-05 | 0.008167608 |

|             |               |                                                                   |           |           |             |             |
|-------------|---------------|-------------------------------------------------------------------|-----------|-----------|-------------|-------------|
| 212320_at   | TUBB          | tubulin, beta                                                     | -1.299804 | -6.004116 | 8.87E-05    | 0.008181462 |
| 218617_at   | TRIT1         | tRNA isopentenyltransferase 1                                     | -0.591201 | -6.002883 | 8.89E-05    | 0.008182152 |
| 228152_s_at | FLJ31033      |                                                                   | -1.750567 | -5.992013 | 9.03E-05    | 0.008283676 |
| 230997_at   | TTC21A        | tetratricopeptide repeat domain 21A                               | -0.370537 | -5.991958 | 9.03E-05    | 0.008283676 |
| 224831_at   | CPEB4         | cytoplasmic polyadenylation element binding protein 4             | 1.189023  | 5.980895  | 9.17E-05    | 0.008399682 |
| 223236_at   | CCDC55        | coiled-coil domain containing 55                                  | 0.756071  | 5.978867  | 9.20E-05    | 0.008399682 |
| 200772_x_at | PTMA          | prothymosin, alpha (gene sequence 28)                             | -0.689887 | -5.978797 | 9.20E-05    | 0.008399682 |
| 205416_s_at | ATXN3         | ataxin 3                                                          | 0.977986  | 5.972517  | 9.29E-05    | 0.008452551 |
| 212071_s_at | SPTBN1        | spectrin, beta, non-erythrocytic 1                                | -1.233513 | -5.972123 | 9.29E-05    | 0.008452551 |
| 214453_s_at | IFI44         | interferon-induced protein 44                                     | -1.698230 | -5.970646 | 9.31E-05    | 0.008456467 |
| 205304_s_at | KCNJ8         | potassium inwardly-rectifying channel, subfamily J, member 8      | -0.114246 | -5.968550 | 9.34E-05    | 0.008467713 |
| 218377_s_at | C21orf6       | chromosome 21 open reading frame 6                                | -1.219473 | -5.967421 | 9.35E-05    | 0.008467713 |
| 225217_s_at | BRPF3         | bromodomain and PHD finger containing, 3                          | 1.084853  | 5.960882  | 9.44E-05    | 0.008518931 |
| 225631_at   | KIAA1706      |                                                                   | -0.619366 | -5.959386 | 9.46E-05    | 0.008518931 |
| 220633_s_at | HP1BP3        | heterochromatin protein 1, binding protein 3                      | 0.252424  | 5.958789  | 9.47E-05    | 0.008518931 |
| 54051_at    | PKNOX1        | PBX/knotted 1 homeobox 1                                          | 1.291912  | 5.958657  | 9.47E-05    | 0.008518931 |
| 210046_s_at | IDH2          | isocitrate dehydrogenase 2 (NADP+), mitochondrial                 | -0.544216 | -5.957281 | 9.49E-05    | 0.008521836 |
| 217807_s_at | GLTSCR2       | glioma tumor suppressor candidate region gene 2                   | -0.377098 | -5.955908 | 9.51E-05    | 0.008524721 |
| 218333_at   | DERL2         | Der1-like domain family, member 2                                 | 0.860365  | 5.951460  | 9.57E-05    | 0.00856555  |
| 204661_at   | CD52          | CD52 antigen (CAMPATH-1 antigen)                                  | -0.734851 | -5.947548 | 9.63E-05    | 0.008584655 |
| 207761_s_at | METTL7A       | methyltransferase like 7A                                         | -2.347865 | -5.946856 | 9.64E-05    | 0.008584655 |
| 208705_s_at | EIF5          | eukaryotic translation initiation factor 5                        | 1.605029  | 5.945776  | 9.65E-05    | 0.008584655 |
| 201665_x_at | RPS17         | ribosomal protein S17                                             | -0.424760 | -5.945395 | 9.66E-05    | 0.008584655 |
| 218383_at   | C14orf94      | chromosome 14 open reading frame 94                               | -0.878614 | -5.941887 | 9.71E-05    | 0.008606494 |
| 238590_x_at | TMEM107       | transmembrane protein 107                                         | -0.672908 | -5.940182 | 9.73E-05    | 0.008606494 |
| 229067_at   | RP11-343N15.3 |                                                                   | 0.715559  | 5.939728  | 9.74E-05    | 0.008606494 |
| 202691_at   | SNRPD1        | small nuclear ribonucleoprotein D1 polypeptide 16kDa              | -0.576680 | -5.939146 | 9.74E-05    | 0.008606494 |
| 1569352_at  | KIAA1450      |                                                                   | 0.241829  | 5.933716  | 9.82E-05    | 0.008660301 |
| 43427_at    | ACACB         | acetyl-Coenzyme A carboxylase beta                                | -0.801964 | -5.930486 | 9.87E-05    | 0.008686812 |
| 213507_s_at | KPNB1         | karyopherin (importin) beta 1                                     | 0.499559  | 5.929178  | 9.89E-05    | 0.008689266 |
| 218101_s_at | NDUFC2        | NADH dehydrogenase (ubiquinone) 1, subcomplex unknown, 2, 14.5kDa | -0.416150 | -5.919075 | 0.000100307 | 0.008803036 |
| 1557116_at  |               |                                                                   | -1.156404 | -5.917815 | 0.00010049  | 0.008804977 |
| 204912_at   | IL10RA        | interleukin 10 receptor, alpha                                    | -1.300773 | -5.915165 | 0.000100877 | 0.008819235 |
| 238367_s_at | MGC33556      |                                                                   | -0.580227 | -5.914483 | 0.000100976 | 0.008819235 |
| 213541_s_at | ERG           | v-ets erythroblastosis virus E26 oncogene like (avian)            | -1.484639 | -5.913384 | 0.000101137 | 0.008819235 |
| 225655_at   | UHRF1         | ubiquitin-like, containing PHD and RING finger domains, 1         | -0.929201 | -5.908710 | 0.000101824 | 0.008865007 |
| 223548_at   | C1orf26       | chromosome 1 open reading frame 26                                | 0.613695  | 5.906865  | 0.000102096 | 0.008874599 |
| 226771_at   | ATP8B2        | ATPase, Class I, type 8B, member 2                                | -0.846112 | -5.903592 | 0.000102582 | 0.008902647 |

|              |          |                                                                                          |           |           |             |             |
|--------------|----------|------------------------------------------------------------------------------------------|-----------|-----------|-------------|-------------|
| 222514_at    | RRAGC    | Ras-related GTP binding C                                                                | 0.947090  | 5.900702  | 0.000103013 | 0.008925854 |
| 1561666_a_at | KIAA1908 |                                                                                          | -0.318662 | -5.898137 | 0.000103396 | 0.008940779 |
| 202878_s_at  | CD93     | CD93 antigen                                                                             | -1.554405 | -5.897225 | 0.000103533 | 0.008940779 |
| 211578_s_at  | RPS6KB1  | ribosomal protein S6 kinase, 70kDa, polypeptide 1                                        | 0.439938  | 5.896279  | 0.000103675 | 0.008940779 |
| 204805_s_at  | H1FX     | H1 histone family, member X                                                              | -0.874335 | -5.893725 | 0.00010406  | 0.008951756 |
| 200028_s_at  | STARD7   | START domain containing 7                                                                | -0.484054 | -5.893262 | 0.00010413  | 0.008951756 |
| 1554053_at   | SPTLC1   | serine palmitoyltransferase, long chain base subunit 1                                   | 0.432475  | 5.890947  | 0.000104481 | 0.008954405 |
| 210623_at    | LOC51035 |                                                                                          | 0.502181  | 5.889854  | 0.000104646 | 0.008954405 |
| 208717_at    | OXA1L    | oxidase (cytochrome c) assembly 1-like                                                   | -1.013034 | -5.889815 | 0.000104652 | 0.008954405 |
| 217814_at    | CCDC47   | coiled-coil domain containing 47                                                         | 0.697963  | 5.887416  | 0.000105017 | 0.008971595 |
| 227002_at    | FAM78A   | family with sequence similarity 78, member A                                             | -0.896715 | -5.884947 | 0.000105395 | 0.008989777 |
| 222669_s_at  | SBDS     | Shwachman-Bodian-Diamond syndrome                                                        | 0.808912  | 5.874033  | 0.000107079 | 0.009094205 |
| 38671_at     | PLXND1   | plexin D1                                                                                | -0.966379 | -5.873500 | 0.000107162 | 0.009094205 |
| 213359_at    | HNRPD    | heterogeneous nuclear ribonucleoprotein D (AU-rich element RNA binding protein 1, 37kDa) | -0.776032 | -5.872886 | 0.000107258 | 0.009094205 |
| 209710_at    | GATA2    | GATA binding protein 2                                                                   | -1.211068 | -5.872715 | 0.000107284 | 0.009094205 |
| 212268_at    | SERPINB1 | serpin peptidase inhibitor, clade B (ovalbumin), member 1                                | -1.172619 | -5.857919 | 0.000109619 | 0.009266173 |
| 236223_s_at  | RIT1     | Ras-like without CAAX 1                                                                  | 1.888542  | 5.857710  | 0.000109652 | 0.009266173 |
| 220755_s_at  | C6orf48  | chromosome 6 open reading frame 48                                                       | -0.615628 | -5.853237 | 0.000110368 | 0.009305832 |
| 201349_at    | SLC9A3R1 | solute carrier family 9 (sodium/hydrogen exchanger), member 3 regulator 1                | -0.657716 | -5.851637 | 0.000110626 | 0.009305832 |
| 218435_at    | DNAJC15  | DnaJ (Hsp40) homolog, subfamily C, member 15                                             | -0.885160 | -5.849233 | 0.000111014 | 0.009305832 |
| 210968_s_at  | RTN4     | reticulon 4                                                                              | 0.736582  | 5.848192  | 0.000111183 | 0.009305832 |
| 223249_at    | CLDN12   | claudin 12                                                                               | -1.366677 | -5.847946 | 0.000111222 | 0.009305832 |
| 237403_at    | GFI1B    | growth factor independent 1B (potential regulator of CDKN1A, translocated in CML)        | -1.631765 | -5.846917 | 0.000111389 | 0.009305832 |
| 200632_s_at  | NDRG1    | N-myc downstream regulated gene 1                                                        | -1.067308 | -5.846853 | 0.0001114   | 0.009305832 |
| 224309_s_at  | SUGT1    | SGT1, suppressor of G2 allele of SKP1 (S. cerevisiae)                                    | 1.634308  | 5.846341  | 0.000111483 | 0.009305832 |
| 214394_x_at  | EEF1D    | eukaryotic translation elongation factor 1 delta (guanine nucleotide exchange protein)   | -0.399053 | -5.843461 | 0.000111952 | 0.009330738 |
| 213036_x_at  | ATP2A3   | ATPase, Ca++ transporting, ubiquitous                                                    | -0.647239 | -5.838221 | 0.00011281  | 0.009387987 |
| 204197_s_at  | RUNX3    | runt-related transcription factor 3                                                      | -1.072947 | -5.835999 | 0.000113177 | 0.009395737 |
| 236798_at    |          |                                                                                          | -1.873341 | -5.835572 | 0.000113247 | 0.009395737 |
| 206090_s_at  | DISC1    | disrupted in schizophrenia 1                                                             | -1.650026 | -5.832646 | 0.000113732 | 0.009421634 |
| 224917_at    | TMEM49   | transmembrane protein 49                                                                 | 1.776330  | 5.828291  | 0.000114457 | 0.009467373 |
| 226507_at    | PAK1     | p21/Cdc42/Rac1-activated kinase 1 (STE20 homolog, yeast)                                 | -0.603505 | -5.825713 | 0.000114889 | 0.009479555 |
| 204798_at    | MYB      | v-myb myeloblastosis viral oncogene homolog (avian)                                      | -1.123200 | -5.825083 | 0.000114994 | 0.009479555 |

|             |           |                                                                                            |           |           |             |             |
|-------------|-----------|--------------------------------------------------------------------------------------------|-----------|-----------|-------------|-------------|
| 230627_at   | STT3B     | STT3, subunit of the oligosaccharyltransferase complex, homolog B ( <i>S. cerevisiae</i> ) | -0.413302 | -5.824309 | 0.000115124 | 0.009479555 |
| 212340_at   | YIPF6     | Yip1 domain family, member 6                                                               | 0.909691  | 5.817173  | 0.000116331 | 0.009558447 |
| 211911_x_at | HLA-B     | major histocompatibility complex, class I, B                                               | -0.693279 | -5.816578 | 0.000116432 | 0.009558447 |
| 200003_s_at | RPL28     | ribosomal protein L28                                                                      | -0.399957 | -5.814676 | 0.000116756 | 0.009570677 |
| 218113_at   | TMEM2     | transmembrane protein 2                                                                    | 0.949605  | 5.811387  | 0.000117319 | 0.009590651 |
| 231697_s_at | TMEM49    | transmembrane protein 49                                                                   | 1.396648  | 5.810867  | 0.000117408 | 0.009590651 |
| 203276_at   | LMNB1     | lamin B1                                                                                   | -1.387063 | -5.810181 | 0.000117526 | 0.009590651 |
| 214155_s_at | LARP4     | La ribonucleoprotein domain family, member 4                                               | 1.444774  | 5.801821  | 0.000118972 | 0.009688901 |
| 201288_at   | ARHGDI3   | Rho GDP dissociation inhibitor (GDI) beta                                                  | -1.366584 | -5.800222 | 0.000119251 | 0.009688901 |
| 202693_s_at | STK17A    | serine/threonine kinase 17a (apoptosis-inducing)                                           | 1.520398  | 5.800161  | 0.000119262 | 0.009688901 |
| 229354_at   | AHRR      | aryl-hydrocarbon receptor repressor                                                        | -0.805342 | -5.798365 | 0.000119576 | 0.009700007 |
| 232231_at   | RUNX2     | runx-related transcription factor 2                                                        | -1.483114 | -5.795187 | 0.000120133 | 0.009730801 |
| 221883_at   | PKNOX1    | PBX/knotted 1 homeobox 1                                                                   | 1.208705  | 5.793171  | 0.000120489 | 0.009743964 |
| 225390_s_at | KLF13     | Kruppel-like factor 13                                                                     | -0.925659 | -5.792245 | 0.000120652 | 0.009743964 |
| 225407_at   | MBP       | myelin basic protein                                                                       | -0.969869 | -5.791028 | 0.000120868 | 0.00974695  |
| 226637_at   | UBE2H     | ubiquitin-conjugating enzyme E2H (UBC8 homolog, yeast)                                     | 1.235818  | 5.782151  | 0.00012245  | 0.00985547  |
| 203529_at   | PPP6C     | protein phosphatase 6, catalytic subunit                                                   | 0.337742  | 5.781464  | 0.000122574 | 0.00985547  |
| 224571_at   | IRF2BP2   | interferon regulatory factor 2 binding protein 2                                           | -1.494917 | -5.779726 | 0.000122887 | 0.009866125 |
| 203152_at   | MRPL40    | mitochondrial ribosomal protein L40                                                        | -0.740752 | -5.778498 | 0.000123108 | 0.009869412 |
| 217925_s_at | C6orf106  | chromosome 6 open reading frame 106                                                        | 0.644875  | 5.771659  | 0.00012435  | 0.009897797 |
| 222996_s_at | CXXC5     | CXXC finger 5                                                                              | -0.596683 | -5.771408 | 0.000124396 | 0.009897797 |
| 218986_s_at | FLJ20035  |                                                                                            | -1.273476 | -5.770670 | 0.00012453  | 0.009897797 |
| 228415_at   | AP1S2     | adaptor-related protein complex 1, sigma 2 subunit                                         | 0.551704  | 5.768903  | 0.000124854 | 0.009897797 |
| 204549_at   | IKBKE     | inhibitor of kappa light polypeptide gene enhancer in B-cells, kinase epsilon              | -0.385530 | -5.768575 | 0.000124914 | 0.009897797 |
| 221475_s_at | RPL15     | ribosomal protein L15                                                                      | -0.442060 | -5.768108 | 0.000125    | 0.009897797 |
| 240121_x_at | LOC388526 |                                                                                            | -0.615351 | -5.765663 | 0.000125449 | 0.009897797 |
| 229285_at   | RNASEL    | ribonuclease L (2',5'-oligoadenylate synthetase-dependent)                                 | -1.296161 | -5.764841 | 0.000125601 | 0.009897797 |
| 216251_s_at | TTLL12    | tubulin tyrosine ligase-like family, member 12                                             | -0.378196 | -5.764101 | 0.000125737 | 0.009897797 |
| 218195_at   | C6orf211  | chromosome 6 open reading frame 211                                                        | 1.000634  | 5.763676  | 0.000125816 | 0.009897797 |
| 216004_s_at | PKNOX1    | PBX/knotted 1 homeobox 1                                                                   | 0.972522  | 5.762633  | 0.000126009 | 0.009897797 |
| 212543_at   | AIM1      | absent in melanoma 1                                                                       | -1.396919 | -5.762610 | 0.000126013 | 0.009897797 |
| 218021_at   | DHRS4     | dehydrogenase/reductase (SDR family) member 4                                              | -0.233783 | -5.762517 | 0.00012603  | 0.009897797 |
| 216559_x_at | LOC120364 |                                                                                            | -0.538919 | -5.761861 | 0.000126152 | 0.009897797 |
| 209829_at   | C6orf32   | chromosome 6 open reading frame 32                                                         | -1.249518 | -5.761722 | 0.000126178 | 0.009897797 |
| 228781_at   |           |                                                                                            | -0.916565 | -5.759726 | 0.000126548 | 0.009912648 |
| 201319_at   | MRCL3     |                                                                                            | -0.569506 | -5.757647 | 0.000126935 | 0.009917757 |
| 208641_s_at | RAC1      | ras-related C3 botulinum toxin substrate 1 (rho family, small GTP binding protein Rac1)    | -0.755530 | -5.757428 | 0.000126976 | 0.009917757 |

|             |      |                            |          |          |             |             |
|-------------|------|----------------------------|----------|----------|-------------|-------------|
| 228846_at   | MXD1 | MAX dimerization protein 1 | 1.220452 | 5.754443 | 0.000127535 | 0.009947163 |
| 203752_s_at | JUND | jun D proto-oncogene       | 0.450281 | 5.752348 | 0.000127928 | 0.009963637 |
