# Supplementary material
Source: PubMed Central journal article supplement (PMC2424160)
Supplement: blood-2007-11-126003_2.pdf [file blood-2007-11-126003_2.pdf]

| <b>UPREGULATED GENES (p &lt; 0.01)</b>                                       |                |                |
|------------------------------------------------------------------------------|----------------|----------------|
| <b>GO Level 5 Categories</b>                                                 |                |                |
| <b>Term</b>                                                                  | <b>P-value</b> | <b>FDR (%)</b> |
| response to unfolded protein                                                 | 1.60E-12       | 0              |
| cellular protein metabolism                                                  | 1.70E-04       | 0.3            |
| intracellular protein transport                                              | 9.70E-03       | 14.1           |
| coenzyme metabolism                                                          | 1.10E-02       | 15.3           |
| nitric oxide biosynthesis                                                    | 2.10E-02       | 28.5           |
| regulation of retroviral genome replication                                  | 4.00E-02       | 46.9           |
| cofactor biosynthesis                                                        | 4.00E-02       | 47             |
| negative regulation of programmed cell death                                 | 4.40E-02       | 50.6           |
| regulation of apoptosis                                                      | 4.50E-02       | 51.1           |
| intracellular transport                                                      | 4.50E-02       | 51.6           |
| regulation of programmed cell death                                          | 4.60E-02       | 52.2           |
| establishment of cellular localization                                       | 5.00E-02       | 54.9           |
| regulation of cell size                                                      | 5.20E-02       | 56.7           |
| cell growth                                                                  | 5.20E-02       | 56.7           |
| protein transport                                                            | 5.90E-02       | 61.6           |
| cation homeostasis                                                           | 6.30E-02       | 64             |
| positive chemotaxis                                                          | 6.50E-02       | 65.2           |
| neutrophil activation                                                        | 6.50E-02       | 65.2           |
| apoptosis                                                                    | 6.60E-02       | 65.8           |
| protein import                                                               | 7.40E-02       | 70.1           |
| regulation of chemotaxis                                                     | 7.80E-02       | 71.8           |
| regulation of nitric oxide biosynthesis                                      | 9.00E-02       | 77.2           |
|                                                                              |                |                |
| <b>BioCarta Pathways</b>                                                     |                |                |
| <b>Term</b>                                                                  | <b>P-value</b> | <b>FDR (%)</b> |
| Hypoxia and p53 in the Cardiovascular system                                 | 9.70E-03       | 12.3           |
| Free Radical Induced Apoptosis                                               | 2.30E-02       | 26.4           |
| Oxidative Stress Induced Gene Expression Via Nrf2                            | 5.40E-02       | 52.4           |
| Skeletal muscle hypertrophy is regulated via AKT/mTOR pathway                | 5.90E-02       | 55.8           |
| Proepithelin Conversion to Epithelin and Wound Repair Control                | 9.60E-02       | 74.4           |
|                                                                              |                |                |
| <b>DOWNREGULATED GENES (p &lt; 0.01)</b>                                     |                |                |
| <b>GO Level 5 Categories</b>                                                 |                |                |
| <b>Term</b>                                                                  | <b>P-Value</b> | <b>FDR (%)</b> |
| transcription                                                                | 9.90E-04       | 1.5            |
| positive regulation of small GTPase mediated signal transduction             | 2.20E-03       | 3.3            |
| regulation of nucleobase, nucleoside, nucleotide and nucleic acid metabolism | 2.40E-03       | 3.7            |
| negative regulation of progression through cell cycle                        | 1.10E-02       | 16.2           |

|                                                          |                |                |
|----------------------------------------------------------|----------------|----------------|
| protein kinase cascade                                   | 2.20E-02       | 29.6           |
| regulation of I-kappaB kinase/NF-kappaB cascade          | 2.50E-02       | 32.5           |
| base-excision repair                                     | 5.10E-02       | 55.7           |
| regulation of small GTPase mediated signal transduction  | 5.60E-02       | 59.2           |
| response to virus                                        | 6.10E-02       | 62.4           |
| protein complex assembly                                 | 6.60E-02       | 65.8           |
| positive regulation of I-kappaB kinase/NF-kappaB cascade | 6.80E-02       | 66.7           |
| nucleocytoplasmic transport                              | 7.10E-02       | 68.2           |
| positive regulation of caspase activity                  | 7.70E-02       | 71.4           |
| protein biosynthesis                                     | 8.20E-02       | 74             |
| antigen presentation, endogenous antigen                 | 9.40E-02       | 78.8           |
|                                                          |                |                |
| <b>BioCarta Pathways</b>                                 |                |                |
| <b>Term</b>                                              | <b>P-Value</b> | <b>FDR (%)</b> |
| IL22 Soluble Receptor Signaling Pathway                  | 6.70E-03       | 13.6           |
| Ras-Independent pathway in NK cell-mediated cytotoxicity | 1.80E-02       | 24             |
