# Supplementary material
Source: PubMed Central journal article supplement (PMC2424160)
Supplement: blood-2007-11-126003_3.pdf [file blood-2007-11-126003_3.pdf]

| <b>Probeset ID</b> | <b>PTL<br/>(mean rank)</b> | <b>Untreated<br/>(mean rank)</b> |
|--------------------|----------------------------|----------------------------------|
| 214328_s_at        | 22212                      | 22179.66667                      |
| 210211_s_at        | 22206.66667                | 22144.5                          |
| 208744_x_at        | 21110                      | 16196.25                         |
| 208687_x_at        | 21976.33333                | 20627.25                         |
| 210338_s_at        | 21578.58333                | 19285.83333                      |
| 221891_x_at        | 22113                      | 21302.58333                      |
| 211969_at          | 21888.75                   | 20605.83333                      |
| 200799_at          | 22150                      | 21512.66667                      |
| 203665_at          | 21816.58333                | 14574.75                         |
| 209882_at          | 16492.91667                | 9935.666667                      |
| 211968_s_at        | 21812.58333                | 20078.25                         |
| 203810_at          | 20971.91667                | 14319.25                         |
| 206976_s_at        | 22034.58333                | 20055                            |
| 213330_s_at        | 19591.5                    | 16543.16667                      |
| 200800_s_at        | 20976.16667                | 13601.91667                      |
| 202581_at          | 21804.5                    | 18763.33333                      |
| 204285_s_at        | 20463.91667                | 16745.33333                      |
| 200627_at          | 21963.5                    | 21698.08333                      |
| 201326_at          | 21099.66667                | 19773.83333                      |
| 202059_s_at        | 18143.83333                | 16417.75                         |
| 202912_at          | 19928.83333                | 16007.75                         |
| 221290_s_at        | 20369.58333                | 17422.75                         |
| 201491_at          | 20001.66667                | 16972.41667                      |
| 201468_s_at        | 20089.83333                | 16294.91667                      |
| 211296_x_at        | 21983.58333                | 21635.16667                      |
| 218417_s_at        | 20383.66667                | 16395.83333                      |
| 202939_at          | 21799.16667                | 21255.25                         |
| 210691_s_at        | 19598.41667                | 17453.08333                      |
| 213813_x_at        | 22173.91667                | 21998.16667                      |
| 214696_at          | 19690.75                   | 14287.08333                      |
| 212788_x_at        | 22115.58333                | 21800                            |
| 200666_s_at        | 21399.08333                | 19265.66667                      |
| 200880_at          | 20838.5                    | 18008.83333                      |
| 200881_s_at        | 21683.66667                | 20435.08333                      |
| 202636_at          | 18327.25                   | 15964.08333                      |
| 200047_s_at        | 22003.5                    | 21792.83333                      |
| 212009_s_at        | 19609.41667                | 15324.66667                      |
| 204286_s_at        | 21494.16667                | 19263.66667                      |
| 213187_x_at        | 21931.33333                | 21182.75                         |
| 200895_s_at        | 20826.08333                | 17288.41667                      |
| 205133_s_at        | 21364.75                   | 19618.75                         |
| 208980_s_at        | 21979.58333                | 21661.41667                      |
| 203811_s_at        | 18905.5                    | 12917.25                         |
| 200064_at          | 21315.83333                | 20348.5                          |
| 211628_x_at        | 22114.08333                | 21784.5                          |
| 218566_s_at        | 21846.66667                | 21123.25                         |

|             |             |             |
|-------------|-------------|-------------|
| 212714_at   | 21167.33333 | 19946.58333 |
| 201266_at   | 22089.5     | 21724.41667 |
| 208868_s_at | 18166.75    | 15902.75    |
| 201994_at   | 22091.91667 | 21935.41667 |
| 201381_x_at | 20308.66667 | 17750.08333 |
| 201471_s_at | 19296       | 17882.33333 |
| 208667_s_at | 21843.75    | 21335.66667 |
| 204341_at   | 20309.75    | 18674.33333 |
| 48106_at    | 20397.5     | 18024       |
| 200996_at   | 21969       | 21750.58333 |
| 208786_s_at | 21812.16667 | 21324.83333 |
| 200070_at   | 21135.33333 | 20693.5     |
| 208706_s_at | 22113       | 21947.33333 |
| 202883_s_at | 20714.58333 | 19634       |
| 203925_at   | 18186.91667 | 11903.58333 |
| 211761_s_at | 20999.41667 | 19649.33333 |
| 212457_at   | 21229.83333 | 19789.75    |
| 213101_s_at | 22128.58333 | 22027.16667 |
| 213532_at   | 21232.91667 | 20354       |
| 202899_s_at | 20581.16667 | 19392.66667 |
| 201437_s_at | 21995.66667 | 21900.33333 |
| 213895_at   | 15248.58333 | 7693.416667 |
| 201586_s_at | 22099.5     | 21976.08333 |
| 214205_x_at | 21112.41667 | 20638.16667 |
| 208290_s_at | 19933.75    | 16236.08333 |
| 210519_s_at | 16603.91667 | 11264.41667 |
| 209921_at   | 20911.66667 | 16332.66667 |
| 222161_at   | 14718.66667 | 9982.833333 |
| 217882_at   | 20958.75    | 18788.33333 |
| 200041_s_at | 21493.5     | 21891.75    |
| 209431_s_at | 14744.41667 | 20338.91667 |
| 209360_s_at | 21221       | 21727.58333 |
| 221875_x_at | 18251.75    | 19464.08333 |
| 200811_at   | 21367.33333 | 21933.08333 |
| 218366_x_at | 10705.66667 | 16753.75    |
| 201362_at   | 19048.16667 | 20490.66667 |
| 209040_s_at | 8758        | 16073.08333 |
| 218633_x_at | 18925.75    | 20663.08333 |
| 219498_s_at | 17196.41667 | 20941.58333 |
| 201328_at   | 20315.25    | 21853.58333 |
| 212560_at   | 17257.25    | 21229.58333 |
| 205051_s_at | 10303.5     | 19702.91667 |
| 201009_s_at | 18211.33333 | 20636.5     |
| 212144_at   | 17117.75    | 18558.08333 |
| 205400_at   | 7671        | 10957.41667 |
| 203528_at   | 20037.91667 | 21568.5     |
| 203445_s_at | 20250.5     | 21269.41667 |

|             |             |             |
|-------------|-------------|-------------|
| 213005_s_at | 10730.66667 | 18403.5     |
| 218543_s_at | 15218.91667 | 19763.58333 |
| 221952_x_at | 21621.75    | 21875.08333 |
| 204205_at   | 14103.25    | 19562.83333 |
| 221004_s_at | 16806.58333 | 19635.58333 |
| 201010_s_at | 19701.66667 | 21473.5     |
| 210347_s_at | 10912.5     | 18948.75    |
| 221688_s_at | 16288.66667 | 18303.41667 |
| 210027_s_at | 16714.66667 | 19159.08333 |
| 214950_at   | 16320.91667 | 19232       |
| 219777_at   | 11836.25    | 20203.83333 |
| 203037_s_at | 12070.66667 | 18033.75    |
| 209770_at   | 15783.58333 | 19499.08333 |
| 208021_s_at | 16247.25    | 18741.83333 |
| 218802_at   | 14486.16667 | 17477.25    |
| 204249_s_at | 17937.5     | 20229.16667 |
| 200810_s_at | 21864.33333 | 22087.66667 |
| 218284_at   | 20230.08333 | 21377.83333 |
| 216262_s_at | 17692.58333 | 19355.5     |
| 201008_s_at | 16618.83333 | 20492       |
| 209761_s_at | 10986.16667 | 15594.5     |
| 219122_s_at | 10910.58333 | 14546.25    |
| 209026_x_at | 14385       | 18490.58333 |
| 37796_at    | 3404.166667 | 4346        |
| 217980_s_at | 4620.25     | 10252.33333 |
| 200789_at   | 13975.5     | 15611.16667 |
| 201310_s_at | 19373.83333 | 21260.91667 |
| 201773_at   | 20881.33333 | 21418.33333 |
| 203879_at   | 18506.75    | 19982.33333 |
| 209083_at   | 13877.91667 | 16454.16667 |
| 219497_s_at | 17845       | 20707.41667 |
| 218689_at   | 16099.83333 | 19875.75    |
| 207168_s_at | 22025.33333 | 22097.91667 |
| 200651_at   | 21245.25    | 21566.58333 |
| 205180_s_at | 13942.25    | 14532.16667 |
| 204040_at   | 13634.08333 | 19970.16667 |
| 209357_at   | 10056.41667 | 17665.58333 |
| 219209_at   | 14001.83333 | 18699.66667 |
| 216384_x_at | 21574.41667 | 21882.5     |
| 200912_s_at | 21882.58333 | 22031.16667 |
| 203983_at   | 21344.41667 | 21792       |
| 215963_x_at | 21574.75    | 21747.5     |
| 210715_s_at | 16350.41667 | 18087.16667 |
| 203010_at   | 13826.41667 | 17496.66667 |
| 211686_s_at | 17445.58333 | 19602.75    |
| 218259_at   | 13025.41667 | 17969.5     |
| 208549_x_at | 21287.75    | 21674.83333 |

|             |             |             |
|-------------|-------------|-------------|
| 206067_s_at | 16001.08333 | 19551.41667 |
| 222129_at   | 21362.66667 | 21759.25    |
| 215313_x_at | 20679.33333 | 21239.16667 |
| 210045_at   | 12792       | 16194.91667 |
| 208698_s_at | 17827.75    | 18731.58333 |
| 202813_at   | 14694.16667 | 18806.16667 |
| 218684_at   | 18533.41667 | 19558.41667 |
| 209543_s_at | 17234.5     | 19915.25    |
| 213385_at   | 8595.416667 | 14567.16667 |
| 209337_at   | 19096.5     | 21002.33333 |
