# Supplementary material
Source: PubMed Central journal article supplement (PMC2424160)
Supplement: blood-2007-11-126003_4.pdf [file blood-2007-11-126003_4.pdf]

| <b>GEO Accession #</b> | <b>Description</b>                                                                                              | <b>V-score</b> |
|------------------------|-----------------------------------------------------------------------------------------------------------------|----------------|
| GSM103359              | CD34+ cells MDS patient (bone marrow)                                                                           | 0.66224        |
| GSM85217               | thyroid sample containing normal cells                                                                          | 0.62162        |
| GSM23508               | CD133-positive immature blasts (bone marrow)                                                                    | 0.61985        |
| GSM23468               | CD133-positive immature blasts (bone marrow)                                                                    | 0.60707        |
| GSM103380              | CD34+ cells MDS patient (bone marrow)                                                                           | 0.60638        |
| GSM60540               | ALL ex vivo material from adult B-ALL patient, peripheral blood taken prior to treatment                        | 0.60426        |
| GSM20904               | Blasts and mononuclear cells purified from bone marrow or peripheral blood aspirates of acute myeloid patients. | 0.60328        |
| GSM76927               | CD34+ hemopoietic progenitors purified from peripheral blood of Idiopathic Myelofibrosis (IM) patients          | 0.60281        |
| GSM20931               | Blasts and mononuclear cells purified from bone marrow or peripheral blood aspirates of acute myeloid patients. | 0.60262        |
| GSM76928               | IM CD34+ progenitor cells                                                                                       | 0.59939        |
| GSM51679               | homo sapiens, childhood ALL patient (male, aged 5.9 years)                                                      | 0.59454        |
| GSM103381              | CD34+ cells MDS patient (bone marrow)                                                                           | 0.59372        |
| GSM103408              | CD34+ cells MDS patient (bone marrow)                                                                           | 0.59272        |
| GSM76926               | CD34+ hemopoietic progenitors purified from peripheral blood of Idiopathic Myelofibrosis (IM) patients          | 0.59087        |
