# Supplementary material
Source: PubMed Central journal article supplement (PMC2424160)
Supplement: blood-2007-11-126003_5.pdf [file blood-2007-11-126003_5.pdf]

| <b>GEO<br/>Accession #</b> | <b>Description</b>                                | <b>V-score</b> |
|----------------------------|---------------------------------------------------|----------------|
| GSM23384                   | Camptothecin Treated HeLa Replicate 3 U133A       | 0.992625       |
| GSM23383                   | Camptothecin Treated HeLa Replicate 2 U133A       | 0.989730       |
| GSM23382                   | Camptothecin Treated HeLa Replicate 1 U133A       | 0.987353       |
| GSM40967                   | HT1080 fibrosarcoma Actinomycin D 24h             | 0.630204       |
| GSM40966                   | HT1080 fibrosarcoma Actinomycin D 24h             | 0.630100       |
| GSM24499                   | Kidney 293 HEK Cells 0 h Rehydration              | 0.593391       |
| GSM24502                   | Kidney 293 HEK Cells 6 h Rehydration              | 0.574403       |
| GSM24501                   | Kidney 293 HEK Cells 0 h Rehydration              | 0.560074       |
| GSM24504                   | Kidney 293 HEK Cells 6 h Rehydration              | 0.550401       |
| GSM24503                   | Kidney 293 HEK Cells 6 h Rehydration              | 0.544466       |
| GSM22062                   | Kidney 293 HEK Cells 4 week storage, 0 h recovery | 0.539705       |
| GSM24500                   | Kidney 293 HEK Cells 0 h Rehydration              | 0.539377       |
| GSM156768                  | HELA cells stimulated with EGF for 120 minutes    | 0.529368       |
| GSM9700                    | primary acute lymphoblastic leukemia cells        | 0.525188       |
