# Supplementary material
Source: PubMed Central journal article supplement (PMC2424160)
Supplement: blood-2007-11-126003_6.pdf [file blood-2007-11-126003_6.pdf]

| <b>GEO<br/>Accession #</b> | <b>Description</b>                         | <b>V-score</b> |
|----------------------------|--------------------------------------------|----------------|
| GSM23377                   | Total RNA from untreated HeLa cells        | 0.987989       |
| GSM23378                   | Untreated HeLa Replicate 4 U133A           | 0.983255       |
| GSM23373                   | Untreated HeLa Replicate 2 U133A           | 0.982538       |
| GSM23372                   | Untreated HeLa Replicate 1 U133A           | 0.976721       |
| GSM84605                   | Hela transfected with siLuc, 1.5 h at 43 C | 0.915650       |
| GSM84601                   | Hela transfected with siLuc, 1.5 h at 43 C | 0.912408       |
| GSM84606                   | Hela transfected with siLuc, 1.5 h at 43 C | 0.910947       |
| GSM84600                   | Hela transfected with siLuc, 0 h at 43 C   | 0.908947       |
| GSM84602                   | Hela transfected with siLuc, 0 h at 43 C   | 0.907972       |
| GSM84603                   | Hela transfected with siLuc, 0 h at 43 C   | 0.907128       |
| GSM84604                   | Hela transfected with siLuc, 0.5 h at 43 C | 0.906772       |
| GSM84598                   | Hela transfected with siLuc, 1.5 h at 43 C | 0.903377       |
| GSM84599                   | Hela transfected with siLuc, 1.5 h at 43 C | 0.903376       |
| GSM84590                   | Hela transfected with siLuc, 0 h at 43 C   | 0.899628       |
