# Supplementary material
Source: PubMed Central journal article supplement (PMC2424160)
Supplement: blood-2007-11-126003_7.pdf [file blood-2007-11-126003_7.pdf]

| rank | cmap name                  | dose   | cell line | CS    |
|------|----------------------------|--------|-----------|-------|
| 1    | 15-delta prostaglandin J2  | 10 µM  | MCF7      | 1.000 |
| 2    | MG-132                     | 21 µM  | MCF7      | 0.928 |
| 3    | 5224221                    | 12 µM  | MCF7      | 0.860 |
| 4    | 5182598                    | 25 µM  | MCF7      | 0.838 |
| 5    | 15-delta prostaglandin J2  | 10 µM  | MCF7      | 0.834 |
| 6    | celastrol                  | 3 µM   | MCF7      | 0.829 |
| 7    | monorden                   | 100 nM | MCF7      | 0.825 |
| 8    | monorden                   | 100 nM | MCF7      | 0.793 |
| 9    | 15-delta prostaglandin J2  | 10 µM  | PC3       | 0.792 |
| 10   | 17-allylamino-geldanamycin | 1 µM   | MCF7      | 0.776 |
| 11   | 17-allylamino-geldanamycin | 1 µM   | MCF7      | 0.760 |
| 12   | 17-allylamino-geldanamycin | 1 µM   | PC3       | 0.751 |
| 13   | monorden                   | 100 nM | MCF7      | 0.746 |
| 14   | 17-allylamino-geldanamycin | 1 µM   | MCF7      | 0.738 |
| 15   | 5253409                    | 17 µM  | MCF7      | 0.735 |

CS = Connectivity Score, highest score is always 1.
